# A transient decrease in mitochondrial activity is required to establish the ganglion cell fate in retina adapted for high acuity vision

Laurent Brodier<sup>1,2</sup>, Tania Rodrigues<sup>1,2</sup>, Lidia Matter-Sadzinski<sup>1,2</sup>, and Jean-Marc Matter<sup>1,2</sup>

<sup>1</sup> Department of Molecular Biology, Sciences III, University of Geneva, 30 quai Ernest-Ansermet, 1211 Geneva 4, Switzerland

<sup>2</sup> Department of Biochemistry, Sciences II, University of Geneva, 30 quai Ernest-Ansermet, 1211 Geneva 4, Switzerland

Correspondence: [Laurent.Brodier@unige.ch](mailto:Laurent.Brodier@unige.ch) or [Jean-Marc.Matter@unige.ch](mailto:Jean-Marc.Matter@unige.ch)

## GRAPHICAL ABSTRACT

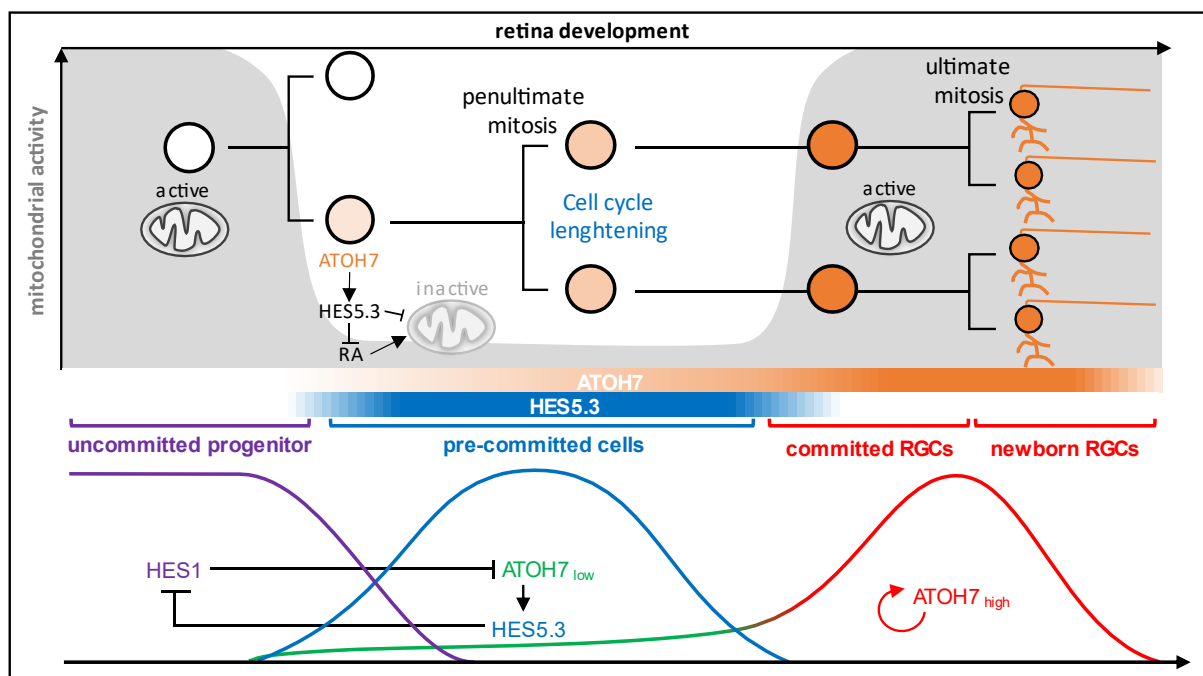

## 1 SUMMARY

2 Although the plan of the retina is well conserved in vertebrates, there are considerable  
3 variations in cell type diversity and number, as well as in the organization and properties of  
4 the tissue. The high ratios of retinal ganglion cells (RGCs) to cones in primate fovea and bird  
5 retinas favor neural circuits essential for high visual acuity and color vision. The role that cell  
6 metabolism could play in cell fate decision during embryonic development of the nervous  
7 system is still largely unknown. Here, we describe how subtle changes of mitochondrial activity  
8 along the pathway converting uncommitted progenitors into newborn RGCs increase the  
9 recruitment of RGC-fated progenitors. ATOH7, a proneural protein dedicated to the production  
10 of RGCs in vertebrates, activates transcription of the Hes5.3 gene in pre-committed  
11 progenitors. The HES5.3 protein, in turn, regulates a transient decrease in mitochondrial  
12 activity via the retinoic acid signaling pathway few hours before cell commitment. This  
13 metabolic shift lengthens the progression of the ultimate cell cycle and is a necessary step for  
14 upregulating Atoh7 and promoting RGC differentiation.

## 15 INTRODUCTION

16 Identifying a link between metabolic state and control of gene activity during cellular  
17 differentiation is a fascinating emerging field under intense investigation in different systems.  
18 Yet, little is known about the role of metabolic rewiring during development of the CNS. The  
19 main challenge lies in the tracing of metabolic activities with sufficient spatiotemporal  
20 resolution during neurogenesis and cell differentiation. The retina and particularly the retinal  
21 ganglion cells (RGCs) are among the largest ATP consumers in the whole body. Adult RGCs  
22 undergo continuous electrical activity and collectively transmit visual information to the brain.  
23 Several metabolic diseases have been linked to deficits in vision, and mitochondria are  
24 recognized as players in development of eye diseases like Leber's hereditary optic neuropathy  
25 (Jarrett et al., 2010). Moreover, defective mitochondria are thought to participate in the  
26 degeneration of optic nerve axons in glaucoma (Osborne et al., 2006; Osborne et al., 2016;  
27 Tezel, 2006). RGC is a type of neuron located near the inner surface of the retina. It receives  
28 visual information from photoreceptors via two intermediate neuron types: bipolar cells and  
29 amacrine cells. RGC axons exit the retina through the optic disk, where they bundle together  
30 to form the optic nerve. RGC axons are unmyelinated before they exit the eye (Andrews et al.,  
31 1999; Bristow et al., 2002), a feature that decreases light scattering but which requires high  
32 and sustained energy supply for action potential propagation.

33 Mitochondria are central to energy production by oxidative phosphorylation (OXPHOS) (Rich  
34 and Marechal, 2010). While RGCs rely largely on OXPHOS for energy supply, recent  
35 experiments confirmed Warburg's original findings suggesting the importance of aerobic  
36 glycolysis in photoreceptors (Chinchore et al., 2017; Ng et al., 2015; Warburg, 1925). Apart  
37 from their classical role as the "powerhouse of the cell", mitochondria have been credited with  
38 many other regulatory functions (McBride et al., 2006). In particular, they could participate in  
39 cell fate decision and differentiation (Folmes et al., 2012). In *Xenopus* retina, progenitor cells  
40 are glycolytic, and the precocious differentiation of progenitors into RGCs is sufficient to induce  
41 a switch to OXPHOS (Agathocleous et al., 2012). A different situation occurs in the developing  
42 mouse retina where neuroblasts rely on OXPHOS for energy supply, whereas glycolysis and  
43 low mitochondrial content are required for RGC differentiation (Esteban-Martinez et al., 2017).  
44 Significant interspecies differences in metabolism could reflect variations in RGC number,  
45 RGC density and in the ratio of RGCs to photoreceptors. We might wonder to what extent  
46 conclusions reached in animal model that have no macula and no fovea are relevant to  
47 metabolic requirement of retinas developing these highly specialized regions. With a high ratio  
48 of RGCs to cones and a rod-free area, the avian retina resembles the primate macula and  
49 fovea (Da Silva and Cepko, 2017; Querubin et al., 2009; Rodrigues et al., 2016). This  
50 prompted us to investigate mitochondrial dynamics and activity along the pathway converting

51 uncommitted progenitors into newborn RGCs in chick and pigeon retinas. We show that active  
52 mitochondria are abundant in uncommitted progenitors as well as in newborn RGCs. Atonal  
53 homolog 7 (ATOH7, also known as Ath5), is required for the production of RGCs in vertebrates  
54 (Brown et al., 2001; Del Bene et al., 2007; Kanekar et al., 1997; Kay et al., 2001; Liu et al.,  
55 2001; Matter-Sadzinski et al., 2001; Wang et al., 2001) and the *Hes5.3* gene  
56 (ENSGALG00000001136) is one of its earliest target. HES5.3 promotes, via cell cycle  
57 lengthening, the transition from pre-committed progenitors into cells committed to the RGC  
58 fate (Chiodini et al., 2013). Here we show that, while uncommitted progenitors have high  
59 contents of active mitochondria, mitochondrial activity drops in Hes5.3+ pre-committed cells.  
60 HES5.3 decreases mitochondrial activity by lowering retinoic acid (RA) level through the  
61 activation of Cyp26A1. Transient inactivation of mitochondria slows down the cell cycle  
62 progression, thereby enhancing the ability of ATOH7 to induce RGCs.

## 63 RESULTS

### 64 ***Apical accumulation of mitochondria at the onset of cell differentiation***

65 To visualize mitochondria in vivo, we electroporated chick embryonic retinas with a plasmid  
66 expressing the DsRed2 fluorescent protein fused to the mitochondrial targeting sequence of  
67 human cytochrome c oxidase subunit VIII under the control of a constitutive CMV promoter  
68 (CMV-MitoDsRed2). A membrane potential is required to send proteins to the inner  
69 mitochondrial membrane (Hood et al., 2003; Rehling et al., 2001) and we assume that this is  
70 valid for MitoDsRed2. MitoTracker Green FM (MTG) is retained in mitochondria irrespectively  
71 of the loss of membrane potential (Elmore et al., 2004), and we found that only a subset of  
72 MTG-labelled mitochondria were labelled with MitoDsRed2 (Fig. S1 A-E). Likewise, the  
73 mitochondria membrane potential indicator tetramethylrhodamine methyl ester (TMRM) did  
74 not mark all MTG positive mitochondria, suggesting that a fraction of mitochondria have lower  
75 membrane potential. TMRM fluorescence disappeared 5 to 10 minutes after addition of 5  $\mu$ M  
76 Carbonyl cyanide-4-(trifluoromethoxy)phenylhydrazone (FCCP), a mitochondrial uncoupler,  
77 whereas this inhibitor had no effect on the MTG signal (Fig. S1 F). Equivalent fractions of MTG  
78 positive mitochondria were labelled with MitoDsRed2 or TMRM, suggesting that MitoDsRed2  
79 and TMRM label mitochondria with high membrane potential (Fig S1 E). First, we asked  
80 whether mitochondria displayed specific intracellular distribution along the apico-basal axis,  
81 which can be associated with specific cell cycle or cell differentiation phases. In chick retinas  
82 electroporated with CMV-MitoDsRed2 and CMV-GFP reporter plasmids at E5 and processed  
83 for confocal microscopy 24 h later, mitochondria preferentially accumulated on the apical side  
84 of the retina (Fig. 1A, D). To determine whether this apical concentration was a general feature  
85 of tissue growth or was related to cell differentiation, we compared the distribution of  
86 mitochondria in chick and pigeon retinas. Although retinas grow at a similar pace in both  
87 species, cell differentiation is delayed by ~3 days in pigeon (Rodrigues et al., 2016). In pigeon  
88 and chick progenitors, mitochondria were distributed along the apico-basal axis (Fig. 1B, C),  
89 and the accumulation of fluorescent mitochondria on the apical side at E5 was more  
90 pronounced in chick than in pigeon retina (Fig. 1A, B, D). In order to ascertain that MitoDsRed2  
91 labeling was reflecting mitochondria distribution, we analyzed chick and pigeon retinas by  
92 transmission electron microscopy (TEM). Mitochondria densities were quantified on the apical  
93 and basal sides as the fraction of cytoplasm occupied by the organelles. While, in chick,  
94 mitochondria were already concentrated apically at E5, in pigeon this accumulation was not  
95 detected before E8 (Figs. 1E, F; S1 G). In line with this result, the same ratios of surface areas  
96 occupied by mitochondria in the apical versus basal retinas were measured at E5 in chick and  
97 at E8 in pigeon (Fig. 1F). There was no bias toward apical localization of mitochondria in chick  
98 at E3, before the onset of neurogenesis (S1 H, I). The repartition of mitochondria identified

99 with the MitoDsRed2 protein and by TEM is biased toward the apical retina at the beginning  
100 of cell differentiation, whereas mitochondria are more broadly distributed along the apico-basal  
101 axis in uncommitted progenitors.

### 102 ***Mitochondria in the RGC lineage***

103 To determine when mitochondria started to accumulate apically, we monitored in real time the  
104 distribution of mitochondria in single Atoh7+ cells before their terminal mitosis (Movie S1).  
105 Apical accumulation of mitochondria roughly coincided with the upregulation of Atoh7 that  
106 occurs 8-15 h before the ultimate mitosis and marks the transition from pre-committed  
107 progenitors to cells committed to the RGC fate. *Hes5.3* is one of the earliest targets of the  
108 ATOH7 protein. The *Atoh7* and *Hes5.3* genes are co-expressed during an initial phase of  
109 selection of progenitors, when ATOH7 is expressed at a low level and progenitors are not yet  
110 committed to differentiation (Fig. 2A). HES5.3-mediated lengthening of the cell cycle is  
111 required for cells to enter the RGC lineage. Sibling cells of the ultimate mitosis express Atoh7  
112 at high levels and extend axons indicating that both become RGCs (Chiodini et al., 2013). This  
113 view is supported by computational analysis of single-cell RNA sequencing data showing that  
114 cells expressing Atoh7 and cells expressing RGC markers (e.g., *Nefm*, *Isl1*, *Pou4f3*, *Slit1*,  
115 *Stmn2*, *Chrn3*) belong to the same cluster (LB and JMM, unpublished data). The situation is  
116 different to that reported in zebrafish, where one Atoh7 progenitor generates one RGC and  
117 one non-RGC daughter cell (Poggi et al., 2005).

118 To monitor mitochondria accumulation along the pathway converting progenitors into newborn  
119 RGCs, E5 (HH25-26) retinas were electroporated with Atoh7-GFP, Hes5.3-GFP, Atoh7-RFP  
120 or Chrn3-GFP in combination with a CMV-MitoDsRed2 or a CMV-MitoGFP reporter plasmid.  
121 Cells were dissociated 8, 24 or 48 h later and selected by fluorescence-activated cell sorting  
122 (FACS). Owing to developmental variations in the strength of the *Atoh7* promoter and to  
123 differences in the fluorescence properties between GFP and RFP (DsRed) (Strongin et al.,  
124 2007; Yanushevich et al., 2002; Yarbrough et al., 2001), the Atoh7-GFP plasmid identifies  
125 most of Atoh7 expressing cells, whereas Atoh7-RFP identifies only cells that express Atoh7  
126 at high levels (See Fig. S4C in Chiodini et al., 2013). About 35% of cells identified with Atoh7-  
127 GFP and consisting of pre-committed progenitors and committed cells, contained  
128 MitoDsRed2-labelled mitochondria (Fig. 2B, C). The same proportion of Atoh7-GFP cells  
129 containing fluorescent mitochondria was found when *MitoDsRed2* was under the control of  
130 the Atoh7 promoter (Fig. S2), hence excluding inactivation of the CMV promoter in cells  
131 identified with Atoh7-GFP. The proportion of Atoh7+ cells containing MitoDsRed2-labelled  
132 mitochondria increased to ~95% in committed cells identified with Atoh7-RFP (Fig. 2B, C).  
133 Consistent with the fact that committed cells express early RGC markers, ~85% of cells  
134 identified with Chrn3-GFP displayed mitochondrial labeling (Fig 2B, C). In contrast, only

135 ~12% of pre-committed progenitors identified with Hes5.3-GFP contained fluorescent  
136 mitochondria (Fig. 2B, C). The same proportion of CMV+ cells labelled with CMV-mitoDsRed2  
137 was detected at 8h and 24h after electroporation (Fig. 2D) and we selected this short  
138 incubation period to diminish the likelihood of counting Hes5.3-GFP cells that already entered  
139 the RGC lineage. Like for Atoh7-GFP cells, the small fraction of cells identified with CMV-GFP  
140 and containing MitoDsRed2-labelled mitochondria (Fig. 2D) indicates that the low content of  
141 labelled mitochondria in Hes5.3+ cells (Fig. 2C) did not result from the lack of activity of the  
142 CMV promoter driving *MitoDsRed2*. These results raised the question of whether the CMV-  
143 GFP and Hes5.3-GFP reporters identify distinct cell populations. The pigeon retina helped to  
144 address this issue: at E4 and E5, cells are uncommitted and Hes5.3 is not expressed  
145 (Rodrigues et al., 2016), and yet ~80% of cells identified with CMV-GFP contained fluorescent  
146 mitochondria (Fig. 2G), a characteristic of uncommitted cells (see below). Finally, if the  
147 MitoDsRed2 protein did not accumulate in mitochondria of Hes5.3+ and CMV+ cells, one could  
148 wonder why this fluorescent protein could hardly be detected in their cytoplasm. Chromophore  
149 maturation requires high DsRed2 concentration (Strongin et al., 2007; Yanushevich et al.,  
150 2002; Yarbrough et al., 2001). We surmise that the concentration threshold was reached for  
151 MitoDsRed2 proteins loaded into mitochondria, but not for proteins in the cytoplasm. In line  
152 with this idea, when cells were electroporated with CMV-RFP (DsRed2), the proportion of  
153 positive cells was much lower after 8h than 24h incubation, whereas the proportion of cells  
154 containing fluorescent mitochondria was the same (Fig. 2D).

155 To determine whether the ~8-fold increase in the proportion of cells with fluorescent  
156 mitochondria between pre-committed progenitors and cells committed to the RGC fate was  
157 reflecting higher mitochondria content, we measured the ratio of mitochondrial DNA (mt-DNA)  
158 to genomic DNA (g-DNA). E5 retinas were co-electroporated with Atoh7-GFP and Atoh7-RFP  
159 plasmids, cells were dissociated 24 h later, and two subsets of cells were selected by FACS:  
160 one of GFP+ cells that did not express RFP and corresponding to Atoh7+ pre-committed  
161 progenitors, and the other one of RFP+ cells committed to the RGC fate. Likewise, pre-  
162 committed progenitors and newborn RGCs were selected using, respectively, Hes5.3-GFP  
163 and *Chrn3*-GFP. Quantitative PCR (qPCR) analysis revealed higher ratios of mt-DNA to g-  
164 DNA in cells committed to the RGC fate than in pre-committed progenitors (Fig. 2E). A lower  
165 ratio of mt-DNA to g-DNA in RGCs identified with *Chrn3*-GFP (Hernandez et al., 1995; Matter  
166 et al., 1995) than in committed cells identified with Atoh7-RFP probably reflects the fact that  
167 RGCs have axons filled with mitochondria (see Fig. 6C; Movie S2) that were lost during cell  
168 dissociation and sorting. The modest increase in the amounts of mt-DNA between pre-  
169 committed progenitors and committed cells did not match the strong increase in the proportion  
170 of cells containing fluorescent mitochondria (Fig. 2C). Nonetheless, we tested whether the

171 augmentation of mt-DNA in committed cells identified with Atoh7-RFP reflected an increase  
172 of mitochondria biogenesis. E5 retinas were co-electroporated with Atoh7-GFP and Atoh7-  
173 RFP and cells were dissociated 24 h later. GFP+ RFP- and RFP+ cells were separated by  
174 FACS and processed for RT-qPCR (Fig. 2F). Hes5.3 and the mitotic marker Kif11 were  
175 expressed at lower levels in RFP+ cells, while RGC markers such as Chrn3 and stathmin 2  
176 (Stmn2) were upregulated. This molecular signature confirmed accurate discrimination  
177 between pre-committed progenitors and cells committed to the RGC fate. The upregulation of  
178 Atoh7 in committed cells was not detected in this assay, because at the time of RNA isolation,  
179 a fraction of RFP+ cells already turned off Atoh7 (Chiodini et al., 2013). Expression of PGC-  
180 1 $\alpha$ , Nrf1 and Tfam, i.e., the main regulators of mitochondria biogenesis, were down-regulated  
181 in RFP+ cells (Fig. 2F) suggesting that cell cycle lengthening rather than mitochondria  
182 biogenesis led to the increase of mt-DNA content in committed cells (Fig. 2E).

183 ***The disappearance of MitoDsRed2-labelled mitochondria in pre-committed progenitors***  
184 ***results from a membrane potential decrease***

185 The activation of *Hes5.3* by ATOH7 marks the onset of neurogenesis and the transition from  
186 uncommitted to pre-committed progenitors. *Hes5.3* is turned on at ~E4 in proliferating  
187 progenitors and turned off 8 to 15 hours before the ultimate mitosis (Fig. 3B inset; Chiodini et  
188 al., 2013). We monitored the proportion of *Hes5.3*+ cells containing fluorescent mitochondria  
189 at E4, E5 and E6 (Fig. 3A, B). The fraction of double-labelled cells abruptly decreased between  
190 E4 and E5 and reached a very low level at E6. In contrast, the proportion of uncommitted  
191 progenitors identified with *Chrna7*-GFP (Matter-Sadzinski et al., 1992) and containing  
192 MitoDsRed2-labelled mitochondria was maintained at a high level during the same period (Fig.  
193 3C). We wondered whether the ~10-fold decrease in the proportion of MitoDsRed2+ cells  
194 observed in the *Hes5.3* subsets between E4 and E6 reflected a decrease in the number of  
195 mitochondria or a blockage in the import of MitoDsRed2 by mitochondria. To address this  
196 issue, we first did morphometric measurements on TEM images of *Hes5.3*+ cells selected by  
197 FACS at E4 and E6 (Figs. 3D; S3 A-E). Analysis at the single cell level did not reveal significant  
198 change in the total mitochondrial area per cell between E4 and E6 (Fig. 3D left panel). A  
199 modest increase in the number of mitochondria (Fig. 3D middle panel) and a decrease in the  
200 average area of individual mitochondria at E6 (Fig. 3D right panel) suggest that mitochondrial  
201 fragmentation could occur in *Hes5.3*+ cells. Likewise, we noted a slight decrease in the  
202 distance between mitochondria but no change in the circularity (Fig. S3 A, B). Overall,  
203 mitochondria density measured by TEM increased because of reduced cytoplasmic areas  
204 (Fig. S3 C, D). A similar increase in mitochondria density between E4 and E6 is detected with  
205 MTG (Fig. S3 F, G). Finally, similar amounts of mt-DNA were detected in *Hes5.3*+ cells at E4  
206 and E5 (Fig. 3E). Next, we compared the expression of genes involved in mitochondria



207 biogenesis and mitophagy in cells identified with Hes5.3-GFP at E4 and E5 (Fig. 3F). The  
208 accumulation of Hes5.3 and Atoh7 transcripts was significantly lower at E4 than at E5  
209 confirming that our assay discriminated between *early* and *late* Hes5.3+ pre-committed  
210 progenitors. The master regulator of mitochondria biogenesis PGC1 $\alpha$  was modestly down-  
211 regulated at E5, while NRF, TFAM, Ncor1 and the mitochondrial autophagy receptor Nix all  
212 remained unchanged. Taken together, our data suggest that the spectacular decrease in the  
213 abundance of MitoDsRed2-labelled mitochondria in Hes5.3+ cells was not accompanied by a  
214 decrease in the number of mitochondria. Then, we measured the mitochondrial membrane  
215 potential in retinal cells using fluorescent TMRM. TMRM labelling was lower in Hes5.3+ cells  
216 than in uncommitted progenitors identified with Chrna7-GFP (Fig. 4A), thus following the same  
217 trend as MitoDsRed2 (Fig. 3C). These results suggest a drop in mitochondrial imports of  
218 MitoDsRed2 in Hes5.3+ pre-committed progenitors resulting from a decrease in mitochondrial  
219 membrane potential.

### 220 ***Mitochondrial inhibitors affect cell cycle length and partially mimic the effect of HES5.3*** 221 ***on RGC fate commitment***

222 HES5.3 increases the rate of conversion of pre-committed progenitors expressing Atoh7 at  
223 low levels into cells committed to the RGC fate and expressing Atoh7 at high levels (Chiodini  
224 et al., 2013). If this process involves a decrease of mitochondrial activity, one would expect  
225 that mitochondrial inhibitors should mimic, to some extent, the effect of HES5.3. To test this  
226 idea, E4 and E5 retinas were electroporated with Atoh7-GFP and Atoh7 RFP and incubated  
227 with Antimycin A, an inhibitor of the mitochondrial electron transport chain, or with FCCP.  
228 Compared to the controls, both inhibitors increased the ratio of RFP+ cells to GFP+ cells (Fig.  
229 4B-D). In cell lines, FCCP or Antimycin A block G1-S transition and slow down progression of  
230 cells through the S phase (Han et al., 2008; Mitra et al., 2009; Schieke et al., 2008). Live  
231 imaging of retinal progenitors identified with Chrna7-GFP enabled us to test the effect of FCCP  
232 on the cell cycle progression. In the control retinas, the cell cycle lasted 14.9 h and cells divided  
233 during the 48 h of recording (Fig. 4E, F). Incubation of retinas with 1  $\mu$ M FCCP induced the  
234 lengthening of the cell cycle (18.6 h) (Fig. 4E, F), while 5  $\mu$ M FCCP blocked the cell cycle  
235 progression over a period of 24 h (Fig. S4A), an effect similar to that induced by the forced  
236 expression of Hes5.3 (see below, Fig. S6D). We reasoned that if the arrest of the cell cycle  
237 progression by FCCP led to an increase of Atoh7 promoter activity, it may also promote the  
238 production of RGCs. To test this idea, two E4 retinas from two separate embryos were  
239 incubated in culture medium containing FCCP while the two opposite retinas from the same  
240 embryos were incubated in medium with DMSO as a control. Retinas were processed for RT-  
241 qPCR analysis in triplicate 12 or 24 h later. A tendency towards increased expression of RGC  
242 markers (Slit1, Pou4F3, Nefm) after 12 h and the robust activation of Chrn3 after 24 h in

243 retinas incubated with 5  $\mu$ M of FCCP (Fig. 4G, H), but not with 1  $\mu$ M (Fig. S4B, C) suggests  
244 that reduced mitochondrial activity could promote RGC differentiation. However, the fact that  
245 *Atoh7*, *Nefm* and *Pou4f3* were downregulated after 24 h of incubation (Fig. 4H) suggests that  
246 cells might fail to differentiate into mature RGCs. In the developing retina, *Hes5.3* expression  
247 is downregulated and mitochondria recover their activity in cells committed to the RGC fate  
248 (see below, Fig. 6; Chiodini et al., 2013). In our experiment with FCCP, we did not reproduce  
249 a transient inhibition of mitochondrial activity similar to the one regulated by *HES5.3*,  
250 suggesting that the recovery of mitochondria activity in cells committed to the RGC fate is  
251 required to produce cells with a mature phenotype.

### 252 ***HES5.3 promotes the decrease of mitochondrial activity***

253 In order to evaluate the role of *HES5.3* in the decrease of mitochondrial membrane potential,  
254 E5 chick retinas were electroporated with CMV-MitoDsRed2 and a  $\beta$  actin-*Hes5.3*:GFP  
255 expression vector or a CMV-GFP control vector. The forced expression of *Hes5.3* led to a  
256 significant decrease in the proportion of cells with MitoDsRed2-labelled mitochondria 24 h later  
257 (Fig. 5A). *Atoh7* is repressed by the Notch effector *HES1* (*Hairy1*, ENSGALG00000002055)  
258 in early retina (Hernandez et al., 2007; Matter-Sadzinski et al., 2005) and gain- and loss-of-  
259 function experiments revealed the inhibitory effect of *HES5.3* upon *Hes1* (Fig. 5B, C). We  
260 asked whether the *Hes1*/*Hes5.3* regulatory pathways could be involved in the decrease of  
261 mitochondrial activity. The forced expression of *Hes1* in a subset of *Hes5.3*-expressing cells  
262 identified with *Hes5.3*-GFP at E5 resulted in an increase in the proportion of MitoDsRed2-  
263 positive *Hes5.3*+ cells 8 h later (Fig. 5D). By overcoming the inhibitory effect of *Hes5.3* and  
264 repressing *Atoh7* expression, *HES1* kept cells in their uncommitted state (Matter-Sadzinski et  
265 al., 2005) and contributed to maintain MitoDsRed2-labelled mitochondria. We wondered how  
266 *HES5.3* could trigger a decrease of mitochondrial activity in progenitors. Our Affymetrix  
267 analysis (see Materials and Methods and Chiodini et al. (2013)) revealed that *HES5.3* could  
268 activate *Cyp26A1*, i.e., an enzyme controlling RA degradation, and repress a retinol  
269 dehydrogenase (*RDH10*), i.e., an enzyme involved in RA synthesis in *Hes5.3*+ pre-committed  
270 progenitors (Fig. 5E), suggesting that *HES5.3* might be responsible for decreasing the level of  
271 RA. It is worthy of mentioning a coincidence between the disappearance of *Cyp26A1*  
272 transcripts in the central area (HAA) of chick retina at HH28 (Da Silva and Cepko, 2017) and  
273 the turn-off of the *Hes5.3* promoter in a narrowly circumscribed central area at HH26-27  
274 (Chiodini et al., 2013).

### 275 ***RA favors mitochondrial activity over glycolysis***

276 The negative effect of *HES5.3* on RA is interesting in light of a recent study reporting the  
277 inhibitory effect of RA on RGC genesis (Da Silva and Cepko, 2017). We wondered whether

278 this was related to the decrease of mitochondrial activity. Indeed, incubation of E5 retinas with  
279 RA increased the proportion of Hes5.3+ cells containing MitoDsRed2-labelled mitochondria in  
280 a dose dependent manner (Fig. 5F). Moreover, when E4 retinas were co-electroporated with  
281 Atoh7-RFP and Atoh7-GFP and incubated with 2.5  $\mu$ M RA for 36 h, the ratio of RFP+ to GFP+  
282 cells was lower than in the control (Fig. 5G). It appears that RA might increase mitochondrial  
283 activity and diminish the chance for progenitors to enter the RGC lineage. In order to assess  
284 the role of RA, we compared the RNA-Seq transcriptomes of Hes5.3+ cells isolated from E5  
285 retinas incubated either with 2.5  $\mu$ M RA or with DMSO for 8 h (Fig. S5). RA treatment reduced  
286 expression of genes encoding glycolytic enzymes, and more particularly, the lactate  
287 dehydrogenase A (LDHA) which plays a key role in aerobic glycolysis (the Warburg effect)  
288 (Liberti and Locasale, 2016). RA also reduced expression of *Rcan1* which has been linked to  
289 mitophagy and glycolytic switch (Ermak et al., 2012). On the other hand, RA increased  
290 expression of genes which could positively influence mitochondrial activity. For example, the  
291 ephrins B2 (EFNB2) and its receptor (EPHB2) can activate the mitochondrial translocation of  
292 Sirt3 (Jung et al., 2017), i.e., a deacetylase that activates mitochondrial function (Sun et al.,  
293 2018). Taken together, our data suggest that RA favors mitochondrial activity at the expense  
294 of aerobic glycolysis and reduces the chance that Atoh7+ / Hes5.3+ pre-committed progenitors  
295 convert into cells committed to the RGC fate.

### 296 ***RA accelerates the cell cycle progression***

297 Having shown that the role HES5.3 played in RGC fate commitment could involve RA  
298 degradation, we sought to identify the commitment point at which decreased mitochondrial  
299 activity was required. Hes5.3 inhibition accelerates the cell cycle (Chiodini et al., 2013) and  
300 we wondered whether incubation of retina with RA could have a similar effect. E4 retina  
301 explants were electroporated with Hes5.3-GFP, incorporated in a 3D matrix of collagen and  
302 incubated with 2.5  $\mu$ M RA for 24 h. We monitored progression of fluorescent cells through the  
303 cell cycle by time-lapse imaging (Figs. 5H; S6A, B). The cell cycle length of 64 Hes5.3+  
304 progenitors that we tracked from mitosis to mitosis lasted 8 to 24 hr. They divided in two  
305 subsets (Fig. 5H): one displaying cell cycle length within the range of cells identified with  
306 Atoh7-GFP, and the other having shorter cycle comparable to that of cells in which Hes5.3  
307 expression was inhibited by siRNAs. We interpret this as evidence that RA accelerated the  
308 cell cycle shortly after the onset of Hes5.3 expression but had no effect at later stages. This is  
309 consistent with the fact that RA decreased the ratio of Atoh7-RFP+ to Atoh7-GFP+ cells at E4  
310 but not at E5 (Fig. 5G) and that RA decreases RGC genesis in the central area (HAA) but not  
311 in peripheral zones that develop at later stages (Da Silva and Cepko, 2017). If increased  
312 mitochondrial activity could accelerate the cell cycle, we wondered what the effect of a  
313 decrease of mitochondrial activity resulting from the forced expression of Hes5.3 would be

314 (Fig. 5A). Time lapse imaging of fluorescent cells in E4 retinas electroporated with a  $\beta$ -actin-  
315 Hes5.3:GFP expression vector revealed that cell cycles lasted  $\geq 30$  hrs because of much  
316 delayed apex-directed migration prior to mitosis on the apical surface (Fig. S6D). Taken  
317 together, these results suggest that after a lapse of low mitochondrial activity in Hes5.3+ pre-  
318 committed progenitors, the downregulation of Hes5.3 is required for the apical accumulation  
319 of active mitochondria during the period preceding the ultimate mitosis.

### 320 ***Mitochondria relocate in newborn RGCs***

321 After their ultimate mitosis, newborn RGCs are paired along the apical surface where they  
322 reside for ~15 h. This arrest coincides with the robust accumulation of the ATOH7 protein (Fig.  
323 2A; Chiodini et al., 2013). To monitor in real-time mitochondria distribution in RGCs, E5 chick  
324 retinas were electroporated with Atoh7-GFP or the early RGC marker Chrn3-GFP and Atoh7-  
325 MitoDsRed2 or CMV-MitoDsRed2 reporter plasmids. Cells imaged on the apical side were  
326 initially bipolar with a short apical process (Fig. 6A cell 1), and shortly after the terminal mitosis  
327 an axon started to grow at the basal pole. When the growth cones reached the basal surface,  
328 they turned at right angle (white arrowheads in Fig. 6A cell 2, and Fig. 6C) and navigated along  
329 the basal surface toward the head of the optic nerve. At this time, RGC somas slowly and  
330 steadily migrated toward the basal surface where they established the ganglion cell layer (Fig.  
331 6A cells 2 and 3, B, C; Chiodini et al., 2013). Mitochondria were restricted to the apical process  
332 in newborn RGCs, and this localization persisted until RGC soma migrated to the basal side.  
333 More precisely, mitochondria accumulated at the endfoot of the apical process (Fig. 6A cells  
334 1, 1', 1'', Fig. 6C), with rare events of transient distribution across the entire apical process  
335 (not shown). During migration of the soma to the basal surface, mitochondria were  
336 redistributed around the nucleus (Fig. 6A cell 2, Fig.6B). First, they clustered apically in the  
337 soma with transient relocation to the basal side (Fig. 6B yellow arrowheads). As the cell  
338 progressed toward its final position, mitochondria were more often present either at both poles  
339 (Fig. 6A cell 2, C 8h red arrowheads) or on the basal side of the soma only (Fig. 6B 8h20 blue  
340 arrowhead). Finally, mitochondria moved into the axon with a lag of a few hours after the axon  
341 had started to grow (Fig. 6C 8h vs. 12h yellow arrowheads). In sum, there is a strong apical  
342 accumulation of mitochondria in newborn RGCs, followed by the relocation of mitochondria  
343 from the apical to the basal poles while RGCs move to the basal side and extend their axons  
344 on the basal surface (Movie S2).

## 345 DISCUSSION

346 The number of mitochondria per cell likely reflects the fine balance between different  
347 processes including biogenesis, mitophagy as well as cytokinesis itself. Both asymmetric  
348 segregation of mitochondria in daughter cells and mitophagy could unbalance mitochondria  
349 counts. In mouse retina, mitophagy creates this unbalance in mitochondrial mass between  
350 neuroblasts and differentiating RGCs (Esteban-Martinez et al., 2017). In chick, no mitophagy  
351 was detected in the RGC lineage and mitochondria apportioning in daughter RGCs was  
352 roughly equal. In chick and pigeon early embryonic retinas, mitochondria biogenesis kept pace  
353 relatively well with the rapid expansion of the pool of retinal progenitors. The ~4-fold decrease  
354 in the ratio of mt-DNA to g-DNA between E4 and E8 remained modest compared with the  
355 ~100-fold increase in cell number during this period (Cherix et al., submitted). The decrease  
356 of mitochondrial mass in the course of retina development correlates with a marked decrease  
357 of mitochondrial activity except in RGCs. The lengthening of the cell cycle of Hes5.3+ pre-  
358 committed progenitors mitigates the decline of mitochondrial content, while the number of  
359 mitochondria per cell increases in newborn RGCs despite a decrease in the expression of  
360 genes involved in mitochondria biogenesis. A drop in mitochondrial membrane potential is the  
361 unique evidence of a metabolic shift in Hes5.3+ pre-committed progenitors. This parsimonious  
362 model of regulation should aim at preserving mitochondria to assure that they regain activity  
363 shortly before the ultimate mitosis and in newborn RGCs. How a disruption of the proton  
364 gradient across the inner mitochondrial membrane could be associated to cell commitment?  
365 It appears that the property of ATOH7 to decrease RA level through the activation of Hes5.3  
366 and Cyp26A1 and, thereby, favoring glycolysis over OXPHOS is instrumental in establishing  
367 the link between cell commitment and metabolism (Fig. 7). This link helps to gain  
368 understanding of why high levels of RA or the inhibition of Hes5.3 expression can reduce the  
369 production of RGCs in the retina (Chiodini et al., 2013; Da Silva and Cepko, 2017). In pigeon,  
370 robust and sustained mitochondrial activity in early retina suggests that RA level could remain  
371 high over a longer period of time than in chick, thereby contributing to postpone RGC  
372 determination and differentiation until the end of the period of cell proliferation.

373 We wondered how a transient decrease of mitochondrial activity can influence the RGC fate  
374 determination, considering that the upregulation of Atoh7 and the lengthening of the cell cycle  
375 are required to achieve this goal. RGCs are the first neurons born in the retina and they are  
376 specified at stages when the vast majority of retinal progenitors divide at a high rate with cell  
377 cycle lasting less than 15 h. Uncommitted progenitors have a high content of active  
378 mitochondria and their low lactate production suggest that they predominantly utilize OXPHOS  
379 for energy supply (Cherix et al., submitted). Rapid rate of mitosis justifies high energetic  
380 requirement (Carbognin et al., 2016; Miettinen and Bjorklund, 2017), even though progenitors

381 need a supply of glycolytic intermediates essential for anabolic reactions during cell division.  
382 The transient decrease in the number of active mitochondria into RGC-biased pre-committed  
383 progenitors probably does not result from a downturn in oxygen and substrate supply, because  
384 a large subset of uncommitted progenitors at the same location maintain a high content of  
385 active mitochondria. Our data suggest that the HES5.3-mediated inactivation of mitochondria  
386 can be a strategy for slowing down cell cycle progression in response to a decrease in ATP  
387 synthesis. Although we do not know yet whether there is a decrease of ATP level in Hes5.3-  
388 expressing cells, previous studies (Mitra et al., 2009) show that mitochondrial uncoupling with  
389 FCCP slows down the cell cycle progression. In the retina, we show that FCCP treatment  
390 lengthens the cell cycle progression and promotes RGC genesis. Taken together, our data  
391 suggest that cell cycle lengthening is a commitment point that requires a transient metabolic  
392 shift towards aerobic glycolysis.

393 It appears that aerobic glycolysis is required for RGC production in chicken and mouse.  
394 However, each species follows a distinct regulatory pathway to achieve this purpose. The fact  
395 that newly generated mouse RGCs contain fewer mitochondria than retinal neuroblasts and  
396 that low mitochondrial content is required for normal axon growth is one out of several  
397 differences in the production of RGCs between birds and rodents (Esteban-Martinez et al.,  
398 2017). In chick, mitochondria adopt very specific distribution in newborn RGCs, with their  
399 apical accumulation before the onset of axogenesis and their migration towards the basal side  
400 when the axon starts to grow. What could be the meaning of the apical accumulation of  
401 mitochondria in committed RGCs shortly before their ultimate mitosis? Mitochondria regained  
402 activity in committed cells and their apical position could facilitate ATP supply for bringing back  
403 cells in G2 on the apical surface and for mitotic spindle formation and myosin ring contraction  
404 to complete cytokinesis. Oxygen supply is another reason that may justify mitochondria  
405 accumulation on the apical surface. When RGCs differentiate, the pecten oculi is not yet  
406 developed and oxygen comes from the choroid, making an apical oxygen gradient plausible.  
407 This could explain why newborn RGCs with high levels of ATOH7 and with growing axons  
408 pause for ~15 h on the apical surface after their ultimate mitosis (Fig. 7; Chiodini et al., 2013).

409 Significant differences between RGC production in chick and mouse could arise from  
410 variations in the regulation of *Atoh7* (Skowronska-Krawczyk et al., 2009) and from the possible  
411 absence of an ortholog of *Hes5.3* in mammals (Fior and Henrique, 2005). As a consequence,  
412 while in chick, ~80% of *Atoh7*+ pre-committed progenitors develop into RGCs, the proportion  
413 drops to ~15% in mouse where the majority of *Atoh7*-expressing cells become photoreceptors  
414 (Brzezinski et al., 2012; Skowronska-Krawczyk et al., 2009; Yang et al., 2003). It would be  
415 interesting to know whether the metabolic shift toward aerobic glycolysis implemented in birds

416 for optimizing the production of RGCs, serve a similar function for cell type specification and  
417 the generation of cell type diversity within other areas of the central nervous system.

## 418 MATERIALS AND METHODS

### 419 **Animals**

420 Chick embryos from a White Leghorn strain (UNIGE Animal Resources Centre) were staged  
421 according to Hamburger and Hamilton (1951). Fertilized pigeon eggs were supplied by  
422 Philippe Delaunay (Pigeonneau de la Suisse Normande, Croisilles, France). Experimental  
423 procedures were carried out in accordance with Federal Swiss Veterinary Regulations. Eyes  
424 were dissected in DPBS (ThermoFisher) and the surrounding retinal pigment epithelium (RPE)  
425 was removed few minutes before electroporation.

### 426 **Reporter and expression plasmids**

427 The Chrnb3 ( $\beta$ 3 nAChR)-GFP plasmid derives from a  $\beta$ 3 nAChR-CAT00 plasmid (Hernandez  
428 et al., 1995). The restriction fragment beginning 128 bases (-128, SphI) 5' of the  $\beta$ 3 initiator  
429 ATG and extending -271 (EcoRI, fragment RS, 143 bp in length) was inserted into the SmaI  
430 site of pCAT00, immediately upstream of the CAT gene. pCAT00 (Crossley and Brownlee,  
431 1990) contains two synthetic polyadenylation sites upstream of the SmaI site and has low-  
432 background activity in retinal cells (Hernandez et al., 1995). The Atoh7(Ath5)-GFP, Hes5.3-  
433 GFP, Chrna7-GFP plasmids and the Atoh7-RFP (DsRed2) plasmid derive, respectively, from  
434 pEGFP-C1 and pDsRed2-N1 plasmid (Clontech). The fragment bounded by the AseI and NheI  
435 restriction sites was deleted from pEGFP-C1 and pDsRed2-N1 and the upstream sequences  
436 of Atoh7 (2220 bp in length, Hernandez et al., 2007), Hes5.3 (1960 bp in length, Chiodini et  
437 al., 2013) or Chrna7 (406 bp in length, Matter-Sadzinski et al., 1992) were subcloned in the  
438 proper orientation at appropriate sites in the vectors. The pEMSV plasmid was used to express  
439 the *cAtoh7*, *cHES1* (Hairy1, ENSGALG00000002055) in co-transfection and electroporation  
440 experiments (Hernandez et al., 2007; Matter-Sadzinski et al., 2005). The  $\beta$  actin-Hes5.3:GFP  
441 expression vector (Fior and Henrique, 2005) is a gift from D. Henrique. The CMV-MitoDsRed2  
442 (pDsRed2-Mito) and CMV-MitoGFP (pAcGFP1-Mito) plasmids are from Clontech. Atoh7-  
443 MitoDsRed2 was designed using UGene software (Unipro). The GFP sequence was excised  
444 from Atoh7-GFP plasmid using AgeI and KpnI restriction enzymes. The MitoDsRed2  
445 sequence from the CMV-MitoDsRed2 plasmid was amplified with PCR and extremities were  
446 digested with XmaI and KpnI restriction enzymes. Ligation was performed using Quick Ligation  
447 Kit.

### 448 **MitoTracker**

449 Retinas or dissociated cells were incubated with MitoTracker Green FM (MTG, ThermoFisher)  
450 at 150 nM concentration in DMEM (Amimed) for 30-40 minutes in a 37°C incubator with 5%  
451 CO<sub>2</sub>. After washing with DMEM, cells were imaged directly under confocal microscope at a  
452 constant 37°C temperature.



453 ***Retina electroporation***

454 Stripped eyes were electroporated in electroporation cuvettes (BT 640, BTX) with the reporter  
455 plasmids CMV-GFP, Atoh7-GFP, Atoh7-RFP, Hes5.3-GFP or Chrn3-GFP at 0.5 µg/µl, CMV-  
456 MitoDsRed2 or CMV-MitoGFP at 0.1 µg/µl, and Atoh7-MitoDsRed2 at 2 µg/µl. Expression  
457 vectors EMSV-Atoh7, EMSV-Ngn2, EMSV-Hes1, and β actin-Hes5.3:GFP were used at 0.5  
458 µg/µl. Electroporation was performed in 100 µl using 5 pulses of 5 V and 50 ms, separated by  
459 1 second interval with BTX ECM830 electroporator.

460 ***Tissue culture***

461 Electroporated retinas were cultured in DMEM (ThermoFisher) complemented with 10% Fetal  
462 Bovine Serum (ThermoFisher) and 1% Penicillin-Streptomycin (ThermoFisher) for 8 h, 24 h,  
463 or 48 h at 37°C in an incubator with 5% CO<sub>2</sub>.

464 ***Tissue dissociation***

465 After 8 h or 24 h of tissue culture, electroporated retinas were washed with HBSS lacking Ca<sup>2+</sup>  
466 and Mg<sup>2+</sup> (ThermoFisher) and dissociated using Trypsin 0.05 % (ThermoFisher) for 15-20  
467 minutes at 37°C. Reaction was blocked by addition of 10% Fetal Bovine Serum  
468 (ThermoFisher).

469 ***Fluorescence Activated Cells Sorting***

470 After dissociation, cells were pelleted and resuspended in DMEM (Amimed). Cells were sorted  
471 by FACS Aria II for GFP positive cells, or with FACS Astrios for GFP and RFP positive cells.  
472 Cells were pelleted and resuspended at 1-2 x 10<sup>6</sup> cells/ml. 100-200 µl cell suspension were  
473 plated on a poly-dl-ornithine (Sigma-Aldrich) coated permanox chamber slide (Lab-Tek). Cells  
474 were left 30 minutes at 37°C and 5% CO<sub>2</sub> for adhesion. Cells were fixed with 4%  
475 paraformaldehyde for 20 minutes. Finally, after DPBS washing, DABCO (Sigma-Aldrich) was  
476 added and the slide was sealed with coverslip for imaging.

477 ***RT-qPCR and mt-DNA quantification by qPCR***

478 RNA from FACS sorted cells or from whole retinas was extracted using TRIzol reagent  
479 (ThermoFisher) according to product manual in triplicate. Primers were designed using NCBI  
480 primer blast and Primer3 websites. Primers were ordered from Microsynth. Primers were  
481 tested using RNA from total retina extracted with TRIzol. RNA quantification was done with  
482 spectrophotometer and Qubit 2.0 (ThermoFisher) and RNA quality was checked using  
483 BioAnalyzer 2100 (Agilent). RT was performed using Takara PrimeScript reverse  
484 transcriptase prior to qPCR. In samples with delta-Ct values > 0.5 across the three technical  
485 replicates, the most extreme value was removed. Quantities were calculated as 2<sup>-(Ctmin-CT)</sup>.  
486 The Average-Quantity was calculated for each sample. geNorm (Vandesompele et al., 2002)  
487 was used to determine the best normalization genes. A normalization factor was calculated

488 as Normalization-Factor=Geometric Mean [Average-Quantity of Normalization Genes] and  
489 was used to calculate the normalized quantity: Normalized-Quantity=Average-  
490 Quantity/Normalization-Factor. The fold change was calculated as: Fold-  
491 Change=Mean[Experiment condition] / Mean[Baseline condition]. P-values were calculated  
492 using a Welch t-test to compare baseline and experiment samples (in log2 scale). DNA of  
493 FACS sorted cells or dissected retinas was extracted according to DNeasy Blood & Tissue Kit  
494 (Qiagen). Primers were designed for targets on g-DNA and mt-DNA. qPCR was performed  
495 and g-DNA used for normalization. RT-qPCR and qPCR were performed using the primers  
496 listed in Table S1. All specific primers for chick and pigeon listed in Table S1 were tested for  
497 efficiency.

### 498 ***Confocal imaging***

499 Intact retinas were fixed with 4% paraformaldehyde for 20 minutes and were mounted on  
500 concave glass slides. Dissociated or FACS sorted cells were plated on permanox chamber  
501 slides (Lab-Tek) coated with poly-dl-ornithine, left 30 minutes for adhesion in a 37°C 5% CO<sub>2</sub>  
502 incubator, and then fixed 20 minutes with 4% paraformaldehyde. Coverslips were sealed after  
503 addition of DABCO with 50% glycerol (Sigma-Aldrich) in DPBS (ThermoFisher). Imaging was  
504 done with a Leica Sp5 Laser scanning Confocal microscope in photon counting mode using a  
505 Leica 20x multi-immersion objective (0.7 N.A.) in Leica type F-type immersion oil of refractive  
506 index 1.518. An Argon laser was used for 488 nm GFP excitation and DPSS561 for 561 nm  
507 RFP excitation. Optical sections of 1 μm were acquired with a 2-4x line accumulation.

### 508 ***Time-Lapse imaging***

509 To monitor interkinetic nuclear migration (INM) and mitosis at the retina equator,  
510 electroporated retinas were placed on a 35-mm glass bottom dish (Pelco, Wilco Wells) and  
511 incorporated in collagen prepared as follow: 100 mg of rat tail collagen type VII (Sigma-Aldrich)  
512 was dissolved in 6ml of 16.7 mM acetic acid overnight at 4°C. 18 ml of double distilled water  
513 was added and the solution was dialyzed overnight against 4.2 mM acetic acid at 4°C. Finally,  
514 550 μl of this reconstituted collage, 80 μl of 4.2 mM acetic acid, 100 μl of DMEM 10x (Amimed)  
515 and 100 μl of 0.28 M sodium bicarbonate were mixed. The dish was incubated at 37°C to allow  
516 collagen polymerization. Culture medium composed of DMEM without phenol red  
517 complemented with 10% fetal bovine serum and 1% Penicillin-Streptomycin was added on top  
518 of the collagen matrix. In experiments using TMRM (Image-iT TMRM Reagent,  
519 ThermoFisher), FCCP (Sigma-Aldrich) or retinoic acid, drug was added directly to culture  
520 medium and reached retinas through collagen in 15-20 minutes. Retinas were imaged 24 h  
521 after electroporation using a Leica Widefield AF6000LX microscope with a Leica 40x dry long-  
522 distance objective (0.55 N.A.) for up to 72 h in the Green and Red channel using Leica GFP  
523 and Rhodamine filter cubes. Stacks of images separated by 1 μm for a total of 40-60 microns

524 were used with a time interval of 20 minutes, 2 minutes or 20 seconds. Data were saved as  
525 \*.lif file.

### 526 ***Transmission Electron Microscopy (TEM)***

527 Retinas or pellets from FACS sorted cells were fixed >24 h in 3.7% formaldehyde, 1%  
528 glutaraldehyde 0.1 M Sodium phosphate monobasic, 0.07 M NaOH in H<sub>2</sub>O at 4°C. Tissue  
529 were washed with 0.1 M ice cold sodium cacodylate before incubation 10 minutes in 0.8%  
530 K<sub>3</sub>Fe(CN)<sub>6</sub> in 0.1 M sodium cacodylate. The tissue was fixed in 1% osmiumtetroxide, 0.8%  
531 K<sub>3</sub>Fe(CN)<sub>6</sub> in 0.1 M sodium cacodylate pH 7.4 for 90 minutes. The tissue was washed with  
532 sodium cacodylate and water, and stained 2h with 1% uranyl acetate in dark. Tissue was  
533 dehydrated in ethanol baths and incubated in propylene oxide 100% for 45 minutes, followed  
534 by propylene oxide/epon 1:1 incubation overnight. Tissue was embedded in epoxy resin  
535 consisting of 48% Agar 100, 18% DDSA, 31% MNA and 3% BDMA. 80-90 nm sections were  
536 produced using a Leica UCT ultra-microtome, and were recovered on TEM grids. Staining was  
537 done by incubation 5 minutes in Acetone / Uranyl Acetate 1:1 solution followed by 10 minutes  
538 in lead citrate solution. TEM images were acquired using a Tecnai G2 Transmission Electron  
539 Microscope. Mitochondria and cytoplasm were delimited in Photoshop CS2 (Adobe), and  
540 areas were measured in imageJ/Fiji. The area ratio of mitochondria to cytoplasm was  
541 calculated.

### 542 ***Image processing and morphometry***

543 3D blind deconvolution of Time-Lapse dataset was done with Autoquant X3 software  
544 (MediaCybernetics). Deconvolution was used to reduce out of focus noise and increase the  
545 contrast. Further image processing was done using ImageJ and Fiji softwares. Cell cycle  
546 length was determined by following cells from mitosis to mitosis in 4D live imaging movies.  
547 Quantification of mitosis frequency (as displayed in figure 4F and S4 A) was done by marking  
548 mitosis in every frame of the 4D movie. Each movie represented a total volume of 5.15E6 μm<sup>3</sup>  
549 (293 μm x 293 μm x 60 μm) that included the optical cross section of the retina equator. The  
550 average number of mitosis for each time frame was calculated across all movies for a given  
551 condition, and represented as a function of time. ImageJ/Fiji plugins were developed to assist  
552 for image analysis (semi-automatic segmentation, colocalization and fluorescence intensity  
553 analysis, mitochondria tracking and kymograph construction, mitochondria morphology  
554 analysis). Those plugins are available upon request.

### 555 ***Statistical analysis:***

556 The proportion and standard deviation of cells positive for mitochondria fluorescence were  
557 calculated, and a Chi-squared test was used to compare two groups. Because the chi-squared  
558 test assumes independence of experimental units, we also confirmed our p-values by

559 permutations of the population data and calculated the difference in mean between the two  
560 groups (10'000 permutations). From this, a normal distribution was derived and used to  
561 calculate the probability to observe a difference equally or more extreme than the experimental  
562 difference. In all cases, this additional test, which does not require independence of  
563 observations, yielded very similar p-values.

#### 564 ***FCCP, Antimycin A, RA***

565 Inhibition of mitochondria activity was performed using FCCP or Antimycin A (Sigma-Aldrich).  
566 Retinas were dissected and electroporated with reporter plasmids. Retinas were cultured for  
567 12h, then 5  $\mu$ M FCCP or 36  $\mu$ M Antimycin were added to culture medium for 12h. After  
568 washing with fresh medium, retinas were kept in culture for additional 12h. Retinas treated  
569 with all-trans retinoic acid (Tocris) were electroporated with reporter plasmids and were kept  
570 for 36h in culture with 25 nM, 250 nM or 2.5  $\mu$ M retinoic acid. Fluorescence was analyzed by  
571 confocal imaging on fixed retinas. For time-lapse imaging experiments using RA, 2.5  $\mu$ M  
572 retinoic acid in culture medium was added on top of collagen 24h before imaging. Medium  
573 was replaced by fresh medium with 2.5  $\mu$ M retinoic acid at beginning of live imaging session.

#### 574 ***Visualization of mitochondrial membrane potential with TMRM***

575 Retinas were electroporated with reporter plasmids and kept in culture for 8 to 24 h. Retinas  
576 were dissociated and plated on chamber slides. TMRM staining was performed using 1 nM  
577 TMRM for 20-30 minutes. Following staining, fluorescence was observed on live cells  
578 maintained at 37°C under confocal microscope. To assess effect of FCCP on  
579 MitoTrackerGreen and TMRM signal, retinas were dissociated and stained with 150 nM MTG  
580 and 1 nM TMRM for 30 min. After washing, fluorescence was observed on live cells under a  
581 Leica Sp5 confocal microscope. 5  $\mu$ M FCCP was added and fluorescence was recorded every  
582 5 minutes and quantified in imageJ/Fiji.

#### 583 ***RNA-sequencing***

584 Chick E5 retinas were electroporated with Hes5.3-GFP and cultured 8h in medium containing  
585 DMSO or 2.5  $\mu$ M RA. RNA was isolated in triplicate from FACS-sorted Hes5.3-GFP+ cells,  
586 and processed for RNA-Seq. Total RNA was quantified with a Qubit (fluorimeter from Life  
587 Technologies) and RNA integrity assessed with a Bioanalyzer (Agilent Technologies). The  
588 SMARTer™ Ultra Low RNA kit from Clontech was used for the reverse transcription and cDNA  
589 amplification according to manufacturer's specifications, starting with 1 ng of total RNA as  
590 input. 200 pg of cDNA were used for library preparation using the Nextera XT kit from Illumina.  
591 Library molarity and quality was assessed with the Qubit and TapeStation using a DNA High  
592 sensitivity chip (Agilent Technologies). Libraries were pooled and loaded at 2 nM for clustering  
593 on a Single-read Illumina Flow cell. Reads of 100 bases were generated using the TruSeq

594 SBS chemistry on an Illumina HiSeq 4000 sequencer. The runs generated 56-68 million reads  
595 per sample, of which  $84.39 \pm 1.33\%$  were mappable to reference genome. Mapping raw reads  
596 to reference genome was performed using STAR aligner v.2.5.3a to the UCSC Gallus gallus  
597 Galgal5 reference. The table of counts with the number of reads mapping to each gene feature  
598 of the UCSC Gallus gallus Galgal5 reference was prepared with HTSeq v0.6p1. The  
599 differential expression analysis was performed with the statistical analysis R/Bioconductor  
600 package edgeR v.3.18.1. Briefly, the counts were normalized according to the library size and  
601 filtered. The genes having a count above 1 count per million reads (cpm) in at least 3 samples  
602 were kept for the analysis. The raw gene number of the set is 6'789. The poorly or not  
603 expressed genes were filtered out. The filtered data set consists of 4'752 genes. The  
604 differentially expressed genes tests were done with paired data GLM (general linearized  
605 model) using a negative binomial distribution.

### 606 ***Affymetrix analysis***

607 The 36h microarray transcription profiling described in Chiodini et al., 2013 was designed to  
608 test the effects of *Hes5.3* siRNAs, *Atoh7* siRNAs and non-targeting (nt) siRNAs on gene  
609 expression at the periphery of the expanding *Hes5.3* domain. Briefly, HH24 chick retinas were  
610 electroporated with *Hes5.3* siRNAs, *Atoh7* siRNAs or nt siRNA and a *HES5.3-RFP* reporter  
611 plasmid. Retina fragments encompassing the peripheral fluorescent domain were micro-  
612 dissected under a stereoscopic microscope 36 hours later. RNA was isolated from fragments  
613 dissected from four retinas and processed for gene chip analysis. For the 16h microarray  
614 analysis, the same siRNAs were used and a similar experimental design was followed.  
615 Collection of the retina fragments for RNA isolation was performed 16 hours after  
616 electroporation. 150 ng of total RNA were used as input for cRNA preparation using the  
617 Ambion WT Expression kit from Ambion (Thermofisher Scientific). After cRNA reverse  
618 transcription, single-strand cDNA were fragmented and labeled with the Affymetrix GeneChip  
619 WT Terminal Labeling Kit. Targets were hybridized on the GeneChip Chicken Gene 1.0 ST  
620 Array. Arrays were washed and stained according to Affymetrix recommendations. GeneChips  
621 were scanned on the GS300 Affymetrix scanner. The data were analyzed with Affymetrix  
622 Expression Console v1.4.1.46 using Affymetrix default analysis settings and RMA as  
623 normalization method. The differential expression analysis was done with a one-way unpaired  
624 Anova with the Affymetrix transcriptome Analysis Console v3.1.0.5.

## 625 ACKNOWLEDGEMENTS

626 We are grateful to Florence Chiodini for valuable help, D. Henrique for the Hes5.3 expression  
627 vector, P. Delaunay for the supply of pigeon eggs, J. M. Nunes for his help with statistical  
628 analysis, and J.-C. Martinou for inspiring discussions and critical reading of the manuscript.  
629 Time-lapse, confocal and electron microscopies were performed at the Bioimaging Platform  
630 of the Faculty of Sciences (<http://bioimaging.unige.ch>). qPCR, RT-qPCR and RNA-Seq  
631 experiments were performed at the iGE3 genomics platform of the University of Geneva  
632 (<http://www.ige3.unige.ch/genomics-platform.php>). FACS were performed at the flow  
633 cytometry facility of the University of Geneva (<https://www.unige.ch/medecine/cytometrie>).

## 634 COMPETING INTERESTS

635 No competing interests declared.

## 636 FUNDING

637 The Swiss National Science Foundation (grant 31003A-149458), the Gelbert Foundation and  
638 the state of Geneva support our laboratory.

## 639 DATA AVAILABILITY

640 Data from RNA sequencing are available at Gene Expression Omnibus (GEO) with accession  
641 number GSE146411. Affymetrix data at 16h are available at GEO with accession number  
642 GSE147258. Various scripts used for data processing and analysis can be found at GitHub  
643 (<https://github.com/lbrodier87>).

## 644 AUTHORS CONTRIBUTION

645 L.B. carried out experiments presented in all Figures except Figure 5 panels B, C, and E, and  
646 figure S6 panel C. T.R. brought her expertise in the design of experiments with the pigeon  
647 retina, and carried out experiments presented in Figure 5 panels B, C and E, and figure S6  
648 panel C. L.B., L.M.S. and J.-M.M. processed and analyzed the data. L.B. and J.-M.M.  
649 conceived the study. L.B., L.M.S. and J.-M.M. wrote the manuscript.

## 650 REFERENCES

- 651 Agathocleous, M., Love, N.K., Randlett, O., Harris, J.J., Liu, J., Murray, A.J., and Harris, W.A.  
652 (2012). Metabolic differentiation in the embryonic retina. *Nat Cell Biol* 14, 859-864.
- 653  
654 Andrews, R.M., Griffiths, P.G., Johnson, M.A., and Turnbull, D.M. (1999). Histochemical  
655 localisation of mitochondrial enzyme activity in human optic nerve and retina. *The British*  
656 *journal of ophthalmology* 83, 231-235.
- 657  
658 Bristow, E.A., Griffiths, P.G., Andrews, R.M., Johnson, M.A., and Turnbull, D.M. (2002). The  
659 distribution of mitochondrial activity in relation to optic nerve structure. *Arch Ophthalmol* 120,  
660 791-796.
- 661  
662 Brown, N.L., Patel, S., Brzezinski, J., and Glaser, T. (2001). Math5 is required for retinal  
663 ganglion cell and optic nerve formation. *Development* 128, 2497-2508.
- 664  
665 Brzezinski, J.A.t., Prasov, L., and Glaser, T. (2012). Math5 defines the ganglion cell  
666 competence state in a subpopulation of retinal progenitor cells exiting the cell cycle.  
667 *Developmental biology* 365, 395-413.
- 668  
669 Carbognin, E., Betto, R.M., Soriano, M.E., Smith, A.G., and Martello, G. (2016). Stat3  
670 promotes mitochondrial transcription and oxidative respiration during maintenance and  
671 induction of naive pluripotency. *EMBO J* 35, 618-634.
- 672  
673 Cherix, A., Brodier, L., Poitry-Yamate, C., Matter, J.M., and Gruetter, R. (2020). The  
674 appearance of the Warburg effect in the developing avian eye characterized in ovo: how  
675 neurogenesis can remodel neuroenergetics. *Invest Ophthalmol Vis Sci*, In press
- 676  
677 Chinchore, Y., Begaj, T., Wu, D., Drokhlyansky, E., and Cepko, C.L. (2017). Glycolytic reliance  
678 promotes anabolism in photoreceptors. *Elife* 6.
- 679  
680 Chiodini, F., Matter-Sadzinski, L., Rodrigues, T., Skowronska-Krawczyk, D., Brodier, L.,  
681 Schaad, O., Bauer, C., Ballivet, M., and Matter, J.M. (2013). A positive feedback loop between  
682 ATOH7 and a Notch effector regulates cell-cycle progression and neurogenesis in the retina.  
683 *Cell Rep* 3, 796-807.
- 684  
685 Crossley, M., and Brownlee, G.G. (1990). Disruption of a C/EBP binding site in the factor IX  
686 promoter is associated with haemophilia B. *Nature* 345, 444-446.
- 687  
688 Da Silva, S., and Cepko, C.L. (2017). Fgf8 Expression and Degradation of Retinoic Acid Are  
689 Required for Patterning a High-Acuity Area in the Retina. *Dev Cell* 42, 68-81 e66.
- 690  
691 Del Bene, F., Ettwiller, L., Skowronska-Krawczyk, D., Baier, H., Matter, J.M., Birney, E., and  
692 Wittbrodt, J. (2007). In vivo validation of a computationally predicted conserved Ath5 target  
693 gene set. *PLoS Genet* 3, 1661-1671.
- 694

- 695 Elmore, S.P., Nishimura, Y., Qian, T., Herman, B., and Lemasters, J.J. (2004). Discrimination  
696 of depolarized from polarized mitochondria by confocal fluorescence resonance energy  
697 transfer. *Arch Biochem Biophys* 422, 145-152.
- 698  
699 Ermak, G., Sojitra, S., Yin, F., Cadenas, E., Cuervo, A.M., and Davies, K.J. (2012). Chronic  
700 expression of RCAN1-1L protein induces mitochondrial autophagy and metabolic shift from  
701 oxidative phosphorylation to glycolysis in neuronal cells. *J Biol Chem* 287, 14088-14098.
- 702  
703 Esteban-Martinez, L., Sierra-Filardi, E., McGreal, R.S., Salazar-Roa, M., Marino, G., Seco, E.,  
704 Durand, S., Enot, D., Grana, O., Malumbres, M., *et al.* (2017). Programmed mitophagy is  
705 essential for the glycolytic switch during cell differentiation. *EMBO J* 36, 1688-1706.
- 706  
707 Fior, R., and Henrique, D. (2005). A novel hes5/hes6 circuitry of negative regulation controls  
708 Notch activity during neurogenesis. *Developmental biology* 281, 318-333.
- 709  
710 Folmes, C.D., Dzeja, P.P., Nelson, T.J., and Terzic, A. (2012). Mitochondria in control of cell  
711 fate. *Circ Res* 110, 526-529.
- 712  
713 Hamburger, V., and Hamilton, H.L. (1951). A series of normal stages in the development of  
714 the chick embryo. *J Morphol* 88, 49-92.
- 715  
716 Han, Y.H., Kim, S.H., Kim, S.Z., and Park, W.H. (2008). Antimycin A as a mitochondrial  
717 electron transport inhibitor prevents the growth of human lung cancer A549 cells. *Oncol Rep*  
718 20, 689-693.
- 719  
720 Hernandez, J., Matter-Sadzinski, L., Skowronska-Krawczyk, D., Chiodini, F., Alliod, C.,  
721 Ballivet, M., and Matter, J.M. (2007). Highly conserved sequences mediate the dynamic  
722 interplay of basic helix-loop-helix proteins regulating retinogenesis. *J Biol Chem* 282, 37894-  
723 37905.
- 724  
725 Hernandez, M.C., Erkman, L., Matter-Sadzinski, L., Roztocil, T., Ballivet, M., and Matter, J.M.  
726 (1995). Characterization of the nicotinic acetylcholine receptor beta 3 gene. Its regulation  
727 within the avian nervous system is effected by a promoter 143 base pairs in length. *J Biol*  
728 *Chem* 270, 3224-3233.
- 729  
730 Hood, D.A., Adihetty, P.J., Colavecchia, M., Gordon, J.W., Irrcher, I., Joseph, A.M., Lowe,  
731 S.T., and Rungi, A.A. (2003). Mitochondrial biogenesis and the role of the protein import  
732 pathway. *Med Sci Sports Exerc* 35, 86-94.
- 733  
734 Jarrett, S.G., Lewin, A.S., and Boulton, M.E. (2010). The importance of mitochondria in age-  
735 related and inherited eye disorders. *Ophthalmic Res* 44, 179-190.
- 736  
737 Jung, Y.H., Lee, H.J., Kim, J.S., Lee, S.J., and Han, H.J. (2017). EphB2 signaling-mediated  
738 Sirt3 expression reduces MSC senescence by maintaining mitochondrial ROS homeostasis.  
739 *Free Radic Biol Med* 110, 368-380.
- 740



- 741 Kanekar, S., Perron, M., Dorsky, R., Harris, W.A., Jan, L.Y., Jan, Y.N., and Vetter, M.L. (1997).  
742 Xath5 participates in a network of bHLH genes in the developing *Xenopus* retina. *Neuron* 19,  
743 981-994.
- 744  
745 Kay, J.N., Finger-Baier, K.C., Roeser, T., Staub, W., and Baier, H. (2001). Retinal ganglion  
746 cell genesis requires lakritz, a Zebrafish atonal Homolog. *Neuron* 30, 725-736.
- 747  
748 Liberti, M.V., and Locasale, J.W. (2016). The Warburg Effect: How Does it Benefit Cancer  
749 Cells? *Trends Biochem Sci* 41, 211-218.
- 750  
751 Liu, W., Mo, Z., and Xiang, M. (2001). The Ath5 proneural genes function upstream of Brn3  
752 POU domain transcription factor genes to promote retinal ganglion cell development.  
753 *Proceedings of the National Academy of Sciences of the United States of America* 98, 1649-  
754 1654.
- 755  
756 Matter-Sadzinski, L., Hernandez, M.C., Roztocil, T., Ballivet, M., and Matter, J.M. (1992).  
757 Neuronal specificity of the alpha 7 nicotinic acetylcholine receptor promoter develops during  
758 morphogenesis of the central nervous system. *EMBO J* 11, 4529-4538.
- 759  
760 Matter-Sadzinski, L., Matter, J.M., Ong, M.T., Hernandez, J., and Ballivet, M. (2001).  
761 Specification of neurotransmitter receptor identity in developing retina: the chick ATH5  
762 promoter integrates the positive and negative effects of several bHLH proteins. *Development*  
763 128, 217-231.
- 764  
765 Matter-Sadzinski, L., Puzianowska-Kuznicka, M., Hernandez, J., Ballivet, M., and Matter, J.M.  
766 (2005). A bHLH transcriptional network regulating the specification of retinal ganglion cells.  
767 *Development* 132, 3907-3921.
- 768  
769 Matter, J.M., Matter-Sadzinski, L., and Ballivet, M. (1995). Activity of the beta 3 nicotinic  
770 receptor promoter is a marker of neuron fate determination during retina development. *The*  
771 *Journal of neuroscience : the official journal of the Society for Neuroscience* 15, 5919-5928.
- 772  
773 McBride, H.M., Neuspiel, M., and Wasiak, S. (2006). Mitochondria: more than just a  
774 powerhouse. *Curr Biol* 16, R551-560.
- 775  
776 Miettinen, T.P., and Bjorklund, M. (2017). Mitochondrial Function and Cell Size: An Allometric  
777 Relationship. *Trends Cell Biol* 27, 393-402.
- 778  
779 Mitra, K., Wunder, C., Roysam, B., Lin, G., and Lippincott-Schwartz, J. (2009). A hyperfused  
780 mitochondrial state achieved at G1-S regulates cyclin E buildup and entry into S phase.  
781 *Proceedings of the National Academy of Sciences of the United States of America* 106, 11960-  
782 11965.
- 783  
784 Ng, S.K., Wood, J.P., Chidlow, G., Han, G., Kittipassorn, T., Peet, D.J., and Casson, R.J.  
785 (2015). Cancer-like metabolism of the mammalian retina. *Clin Exp Ophthalmol* 43, 367-376.
- 786

- 787 Osborne, N.N., Lascaratos, G., Bron, A.J., Chidlow, G., and Wood, J.P. (2006). A hypothesis  
788 to suggest that light is a risk factor in glaucoma and the mitochondrial optic neuropathies. The  
789 British journal of ophthalmology *90*, 237-241.
- 790  
791 Osborne, N.N., Nunez-Alvarez, C., Joglar, B., and Del Olmo-Aguado, S. (2016). Glaucoma:  
792 Focus on mitochondria in relation to pathogenesis and neuroprotection. *Eur J Pharmacol* *787*,  
793 127-133.
- 794  
795 Poggi, L., Vitorino, M., Masai, I., and Harris, W.A. (2005). Influences on neural lineage and  
796 mode of division in the zebrafish retina in vivo. *J Cell Biol* *171*, 991-999.
- 797  
798 Querubin, A., Lee, H.R., Provis, J.M., and O'Brien, K.M. (2009). Photoreceptor and ganglion  
799 cell topographies correlate with information convergence and high acuity regions in the adult  
800 pigeon (*Columba livia*) retina. *J Comp Neurol* *517*, 711-722.
- 801  
802 Rehling, P., Wiedemann, N., Pfanner, N., and Truscott, K.N. (2001). The mitochondrial import  
803 machinery for preproteins. *Crit Rev Biochem Mol Biol* *36*, 291-336.
- 804  
805 Rich, P.R., and Marechal, A. (2010). The mitochondrial respiratory chain. *Essays Biochem* *47*,  
806 1-23.
- 807  
808 Rodrigues, T., Krawczyk, M., Skowronska-Krawczyk, D., Matter-Sadzinski, L., and Matter,  
809 J.M. (2016). Delayed neurogenesis with respect to eye growth shapes the pigeon retina for  
810 high visual acuity. *Development* *143*, 4701-4712.
- 811  
812 Schieke, S.M., McCoy, J.P., Jr., and Finkel, T. (2008). Coordination of mitochondrial  
813 bioenergetics with G1 phase cell cycle progression. *Cell Cycle* *7*, 1782-1787.
- 814  
815 Skowronska-Krawczyk, D., Chiodini, F., Ebeling, M., Alliod, C., Kundzewicz, A., Castro, D.,  
816 Ballivet, M., Guillemot, F., Matter-Sadzinski, L., and Matter, J.M. (2009). Conserved regulatory  
817 sequences in *Atoh7* mediate non-conserved regulatory responses in retina ontogenesis.  
818 *Development* *136*, 3767-3777.
- 819  
820 Strongin, D.E., Bevis, B., Khuong, N., Downing, M.E., Strack, R.L., Sundaram, K., Glick, B.S.,  
821 and Keenan, R.J. (2007). Structural rearrangements near the chromophore influence the  
822 maturation speed and brightness of DsRed variants. *Protein Eng Des Sel* *20*, 525-534.
- 823  
824 Sun, W., Liu, C., Chen, Q., Liu, N., Yan, Y., and Liu, B. (2018). SIRT3: A New Regulator of  
825 Cardiovascular Diseases. *Oxid Med Cell Longev* *2018*, 7293861.
- 826  
827 Tezel, G. (2006). Oxidative stress in glaucomatous neurodegeneration: mechanisms and  
828 consequences. *Progress in retinal and eye research* *25*, 490-513.
- 829  
830 Vandesompele, J., De Preter, K., Pattyn, F., Poppe, B., Van Roy, N., De Paepe, A., and  
831 Speleman, F. (2002). Accurate normalization of real-time quantitative RT-PCR data by  
832 geometric averaging of multiple internal control genes. *Genome Biol* *3*, RESEARCH0034.

- 833  
834 Wang, S.W., Kim, B.S., Ding, K., Wang, H., Sun, D., Johnson, R.L., Klein, W.H., and Gan, L.  
835 (2001). Requirement for math5 in the development of retinal ganglion cells. *Genes &*  
836 *development* 15, 24-29.
- 837  
838 Warburg, O. (1925). The Metabolism of Carcinoma Cells. *The Journal of Cancer Research* 9,  
839 148-163.
- 840  
841 Yang, Z., Ding, K., Pan, L., Deng, M., and Gan, L. (2003). Math5 determines the competence  
842 state of retinal ganglion cell progenitors. *Developmental biology* 264, 240-254.
- 843  
844 Yanushevich, Y.G., Staroverov, D.B., Savitsky, A.P., Fradkov, A.F., Gurskaya, N.G., Bulina,  
845 M.E., Lukyanov, K.A., and Lukyanov, S.A. (2002). A strategy for the generation of non-  
846 aggregating mutants of Anthozoa fluorescent proteins. *FEBS Lett* 511, 11-14.
- 847  
848 Yarbrough, D., Wachter, R.M., Kallio, K., Matz, M.V., and Remington, S.J. (2001). Refined  
849 crystal structure of DsRed, a red fluorescent protein from coral, at 2.0-Å resolution.  
850 *Proceedings of the National Academy of Sciences of the United States of America* 98, 462-  
851 467.
- 852

## FIGURES

Figure 1

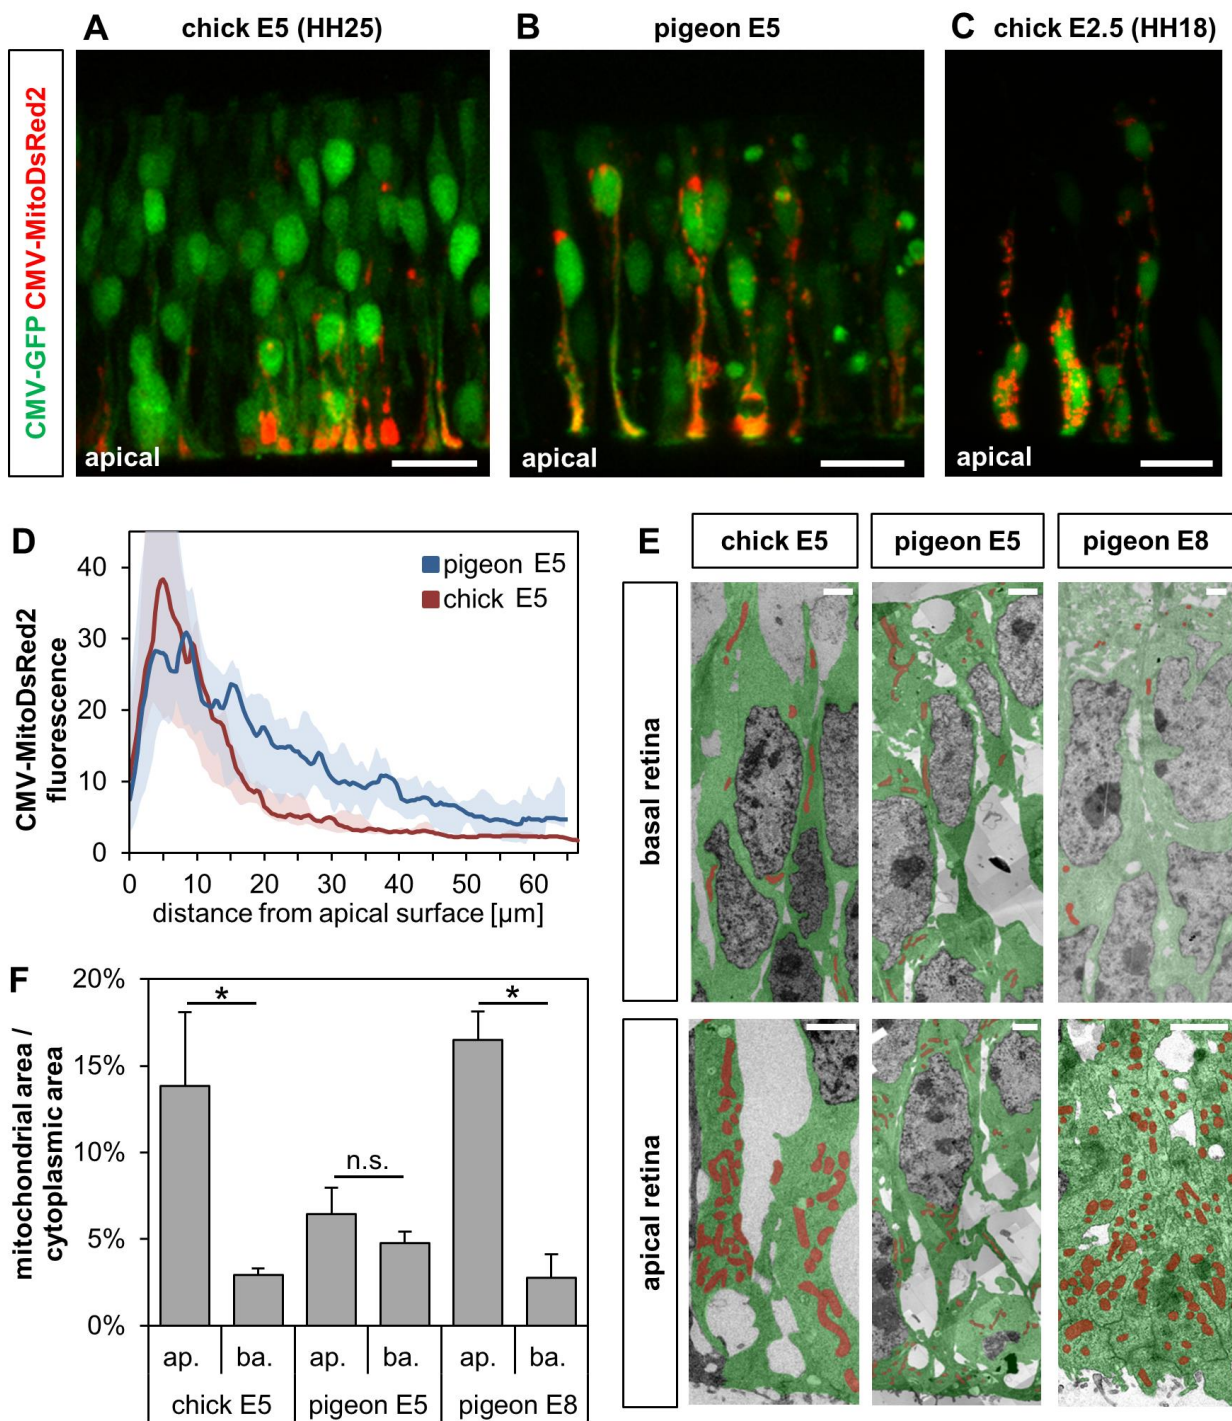

**Figure 1: apical accumulation of mitochondria at the onset of cell differentiation**

(A-C) Embryonic day 5 (E5) chick (A), E5 pigeon (B), E2.5 chick (C) retinas were co-electroporated with CMV-GFP and CMV-MitoDsRed2, and fluorescent cells were observed 24 h later by confocal microscopy. (D) Distribution of fluorescent mitochondria along the baso-apical axis in chick and pigeon retinas at E5. The lines represent the mean values and the envelopes include the mean  $\pm$  s.d. Mitochondria distribution was determined in 15 areas,  $\sim$ 150  $\mu$ m width, in 2 retinas of each species. (E) E5 chick, and E5 and E8 pigeon retinas were processed for TEM. Images were stitched into a large mosaic to derive the apical and basal areas. Representative areas derived from these mosaics are shown, in which the mitochondria and the cytoplasm are artificially colored, respectively, in red and in green. (F) Ratio of the mitochondrial to cytoplasmic surface areas measured on the TEM picture mosaics. Histogram represents mean  $\pm$  s.d., calculated from 2-4 mosaics from 2 retinas of each species, (\* $p < 0.05$ ; unpaired t-test;  $n = 2-4$  per group). Scale bars: 20  $\mu$ m (A-C), 2  $\mu$ m (E).

Figure 2

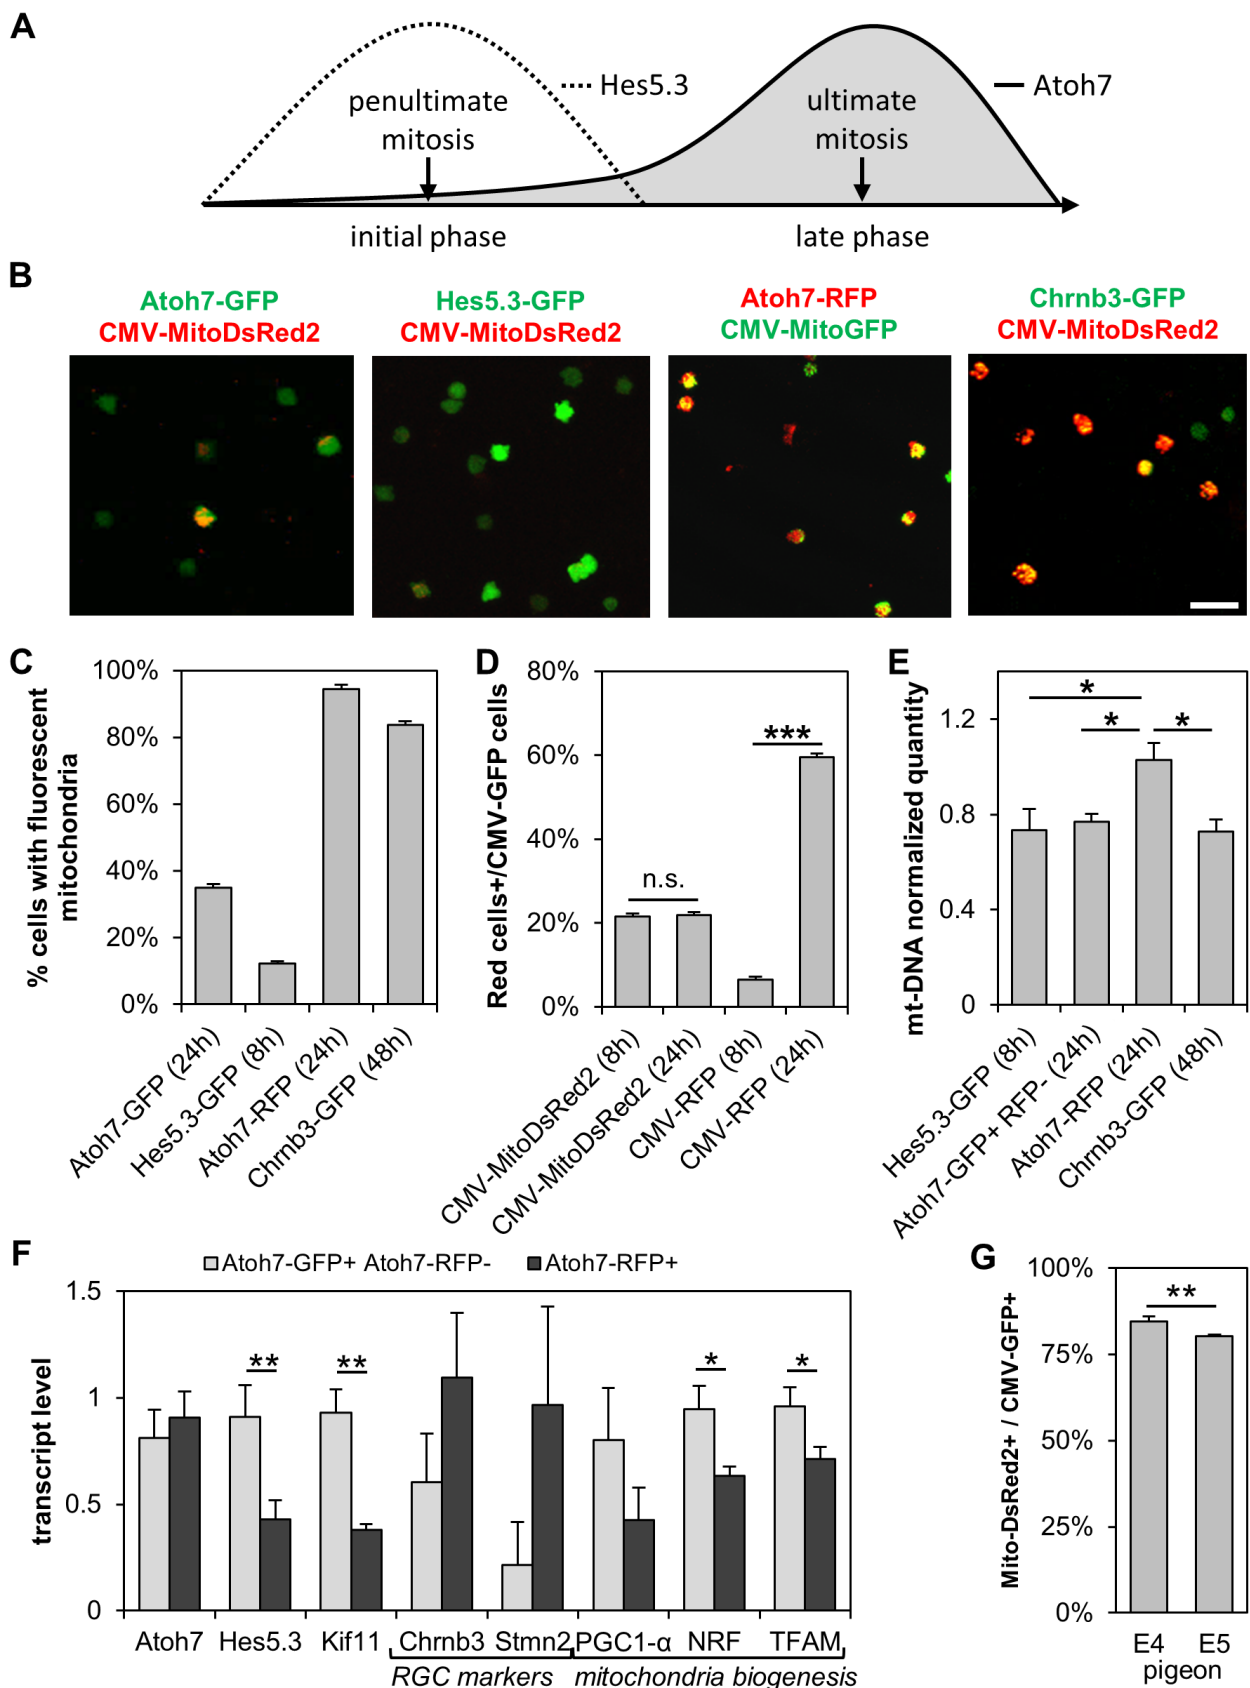

**Figure 2: Mitochondria in the RGC lineage**

(A) Schematic view of the time-course of Hes5.3 and Atoh7 expression during the penultimate and ultimate cell cycles. (B-F) E5 chick and (G) E4, E5 pigeon retinas were co-electroporated with reporter plasmids to identify different cell subsets. Retinas were disaggregated 8, 24 or 48 h later and subsets of cells were selected by FACS. (B-D) Cells were analyzed by confocal imaging. (C) Percentage of GFP+ or RFP+ cells with MitoDsRed2- or MitoGFP-labelled mitochondria. Data are presented as mean  $\pm$  s.d. (Atoh7-GFP n=1879 cells, Hes5.3-GFP n=3531, Atoh7-RFP n=287, Chrb3-GFP n=1571; all pairwise comparison show  $p < 0.001$ ; Chi-square test). (D) Percentage of GFP+ with labelled mitochondria and ratio of RFP+ to GFP+. Data are presented as mean  $\pm$  s.d. (\*\* $p < 0.001$ , n.s. not significant; Chi-square test; CMV-RFP 8h n=1017 cells, 24h n=1219, CMV-MitoDsRed2 8h n=3129, 24h n=2997). (E) The ratios of mt-DNA to g-DNA. Data are presented as mean  $\pm$  s.d. (\* $p < 0.05$ ; unpaired t-test; n=3). (F) E5 retinas were co-electroporated with Atoh7-RFP and Atoh7-GFP. Cells were dissociated 24 h later. GFP+ RFP- and RFP+ cells were sorted by FACS. RNA was isolated and processed for RT-qPCR. Histogram shows mean  $\pm$  s.d. (\* $p < 0.05$ , \*\* $p < 0.01$ ; unpaired t-test; n=3). (G) Percentage of GFP+ cells with MitoDsRed2-labelled mitochondria. Data are presented as mean  $\pm$  s.d. (\*\* $p < 0.01$ , Chi square test; Pigeon E4 n=827, E5 n=4861). Scale bar: 20  $\mu$ m.

Figure 3

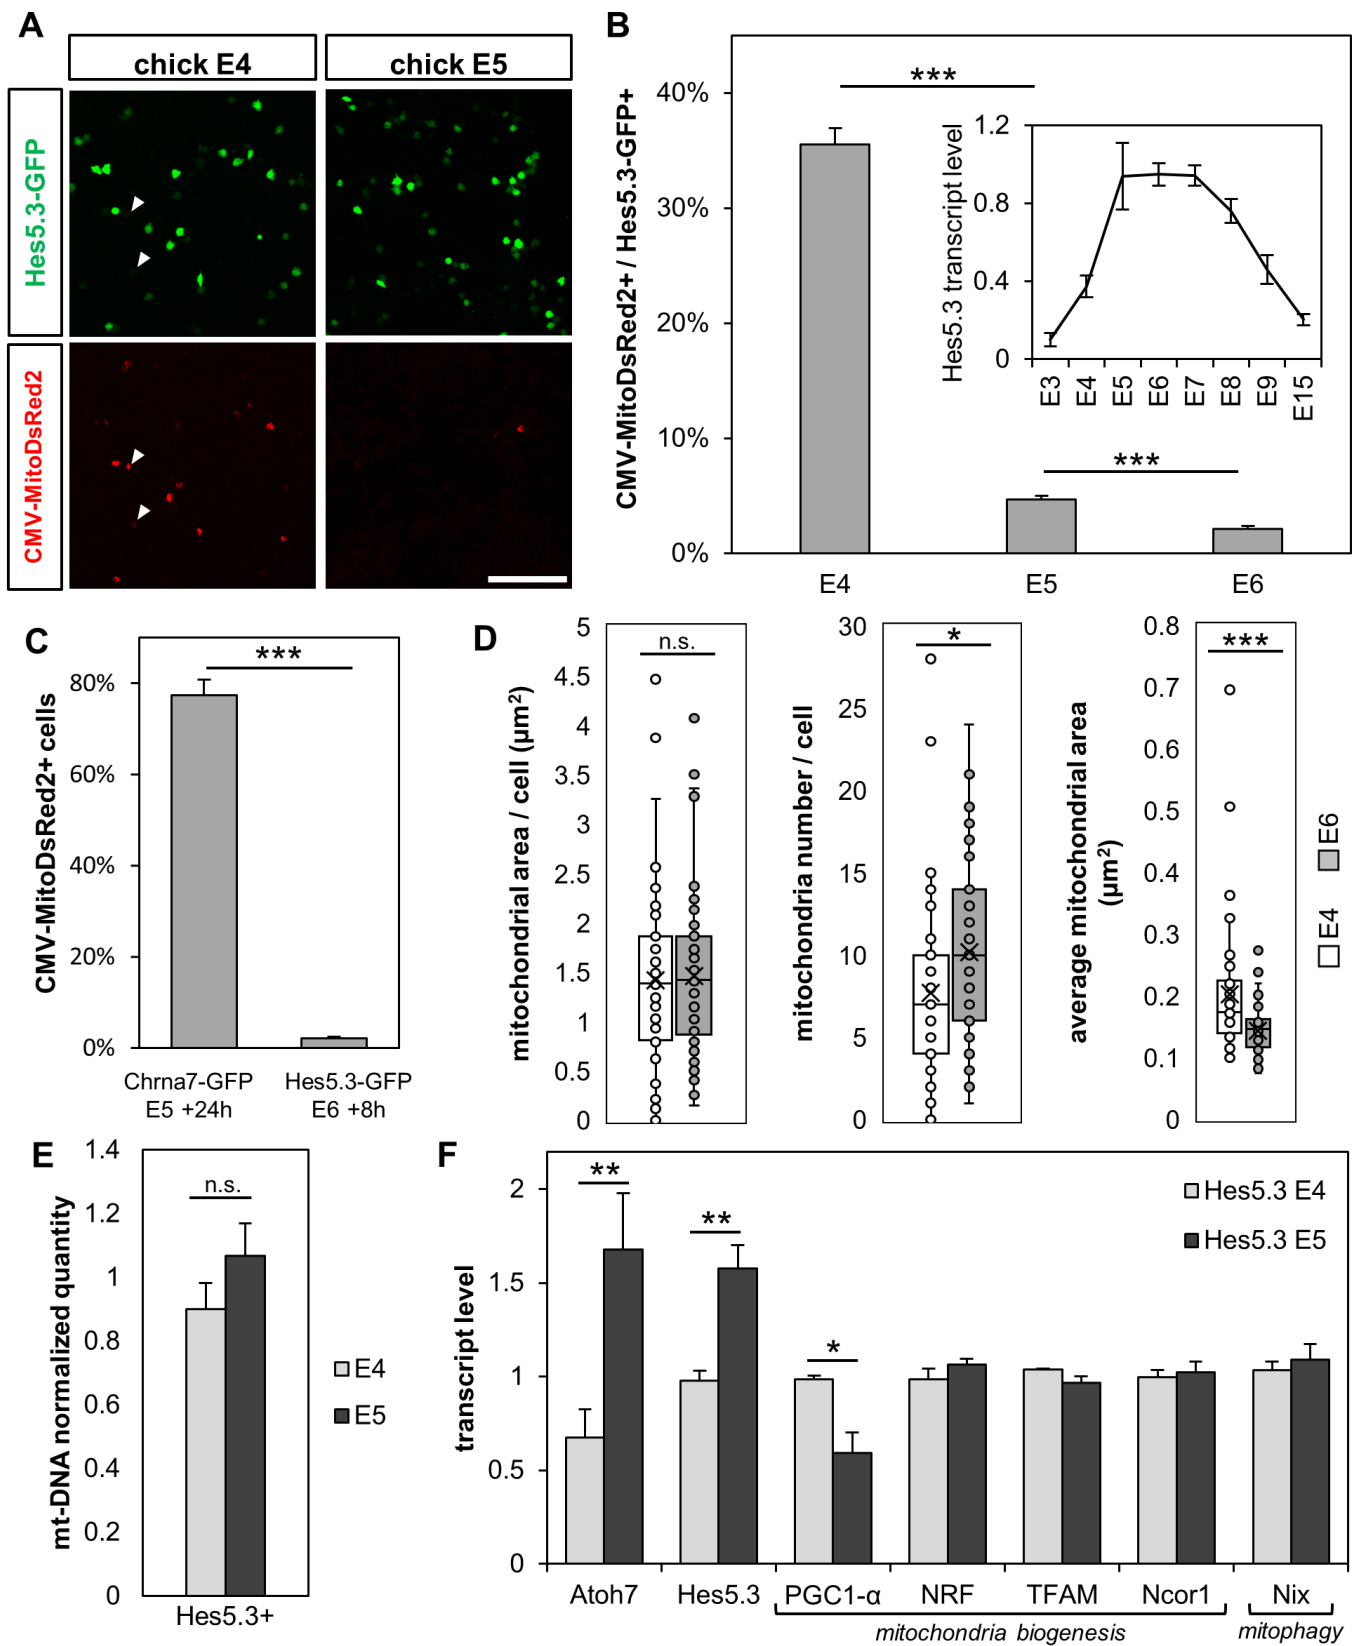



**Figure 3: MitoDsRed2-labeling and mitochondrial count in Hes5.3+ pre-committed progenitors**

(A, B) MitoDsRed2-labeling in Hes5.3+ cells. E4 (HH22-23), E5 (HH25-26) and E6 (HH28-29) retinas were co-electroporated with Hes5.3-GFP and CMV-MitoDsRed2. Retinas were disaggregated 8 h later and GFP+ cells were selected by FACS for confocal imaging (A). Arrowheads indicate MitoDsRed2 positive cells that are negative for Hes5.3-GFP (B) Percentage of GFP+ cells with mitochondria. Data are presented as mean  $\pm$  s.d. (\*\*p<0.001; Chi square test; E4 n=1126 cells, E5 n=3953, E6 n=3965). (B, inset) Accumulation of Hes5.3 transcripts measured by RT-qPCR as mean  $\pm$  s.d. from biological triplicates. (C) Retinas were electroporated with Chrna7-GFP or Hes5.3-GFP and Mito-DsRed2-RFP to compare mitochondrial activity between uncommitted and pre-committed progenitors. GFP+ cells were sorted by FACS and the percentage  $\pm$  s.d. of cells with mitochondria are shown (\*\*p<0.001; Chi square test; Chrna7-GFP n=164 cells, Hes5.3-GFP n=3965). (D) Morphometric measurements of mitochondria in individual Hes5.3+ cells. E4 and E6 chick retinas were electroporated with Hes5.3-GFP. Dissociated GFP+ cells were sorted by FACS 8 h later and processed for TEM. Boxplot comprises median (central line) surrounded by 25<sup>th</sup> and 75<sup>th</sup> percentiles and mean indicated as cross. Whiskers show min and max values inside the 1.5 times interquartile range, and dots show all values including outliers (left p=0.7431, center p=0.0158, right p=0.0008; unpaired t-test; E4 n=51 cells, E6 n=55). (E) mt-DNA content relative to gDNA in Hes5.3+ cells. Cells were dissociated 8 h after electroporation, GFP+ cells were sorted by FACS and DNA was quantified. Data are presented as mean  $\pm$  s.d. (p>0.05, unpaired t-test, n=3). (F) Transcript profiles in Hes5.3+ progenitors. Cells were dissociated 8 h after electroporation, GFP+ cells were sorted by FACS and RNA was quantified by RT-qPCR in triplicate. Data are presented as mean  $\pm$  s.d., (\*p<0.05, \*\*p<0.01; unpaired t-test; n=3). Scale bar: 100  $\mu$ m.

Figure 4

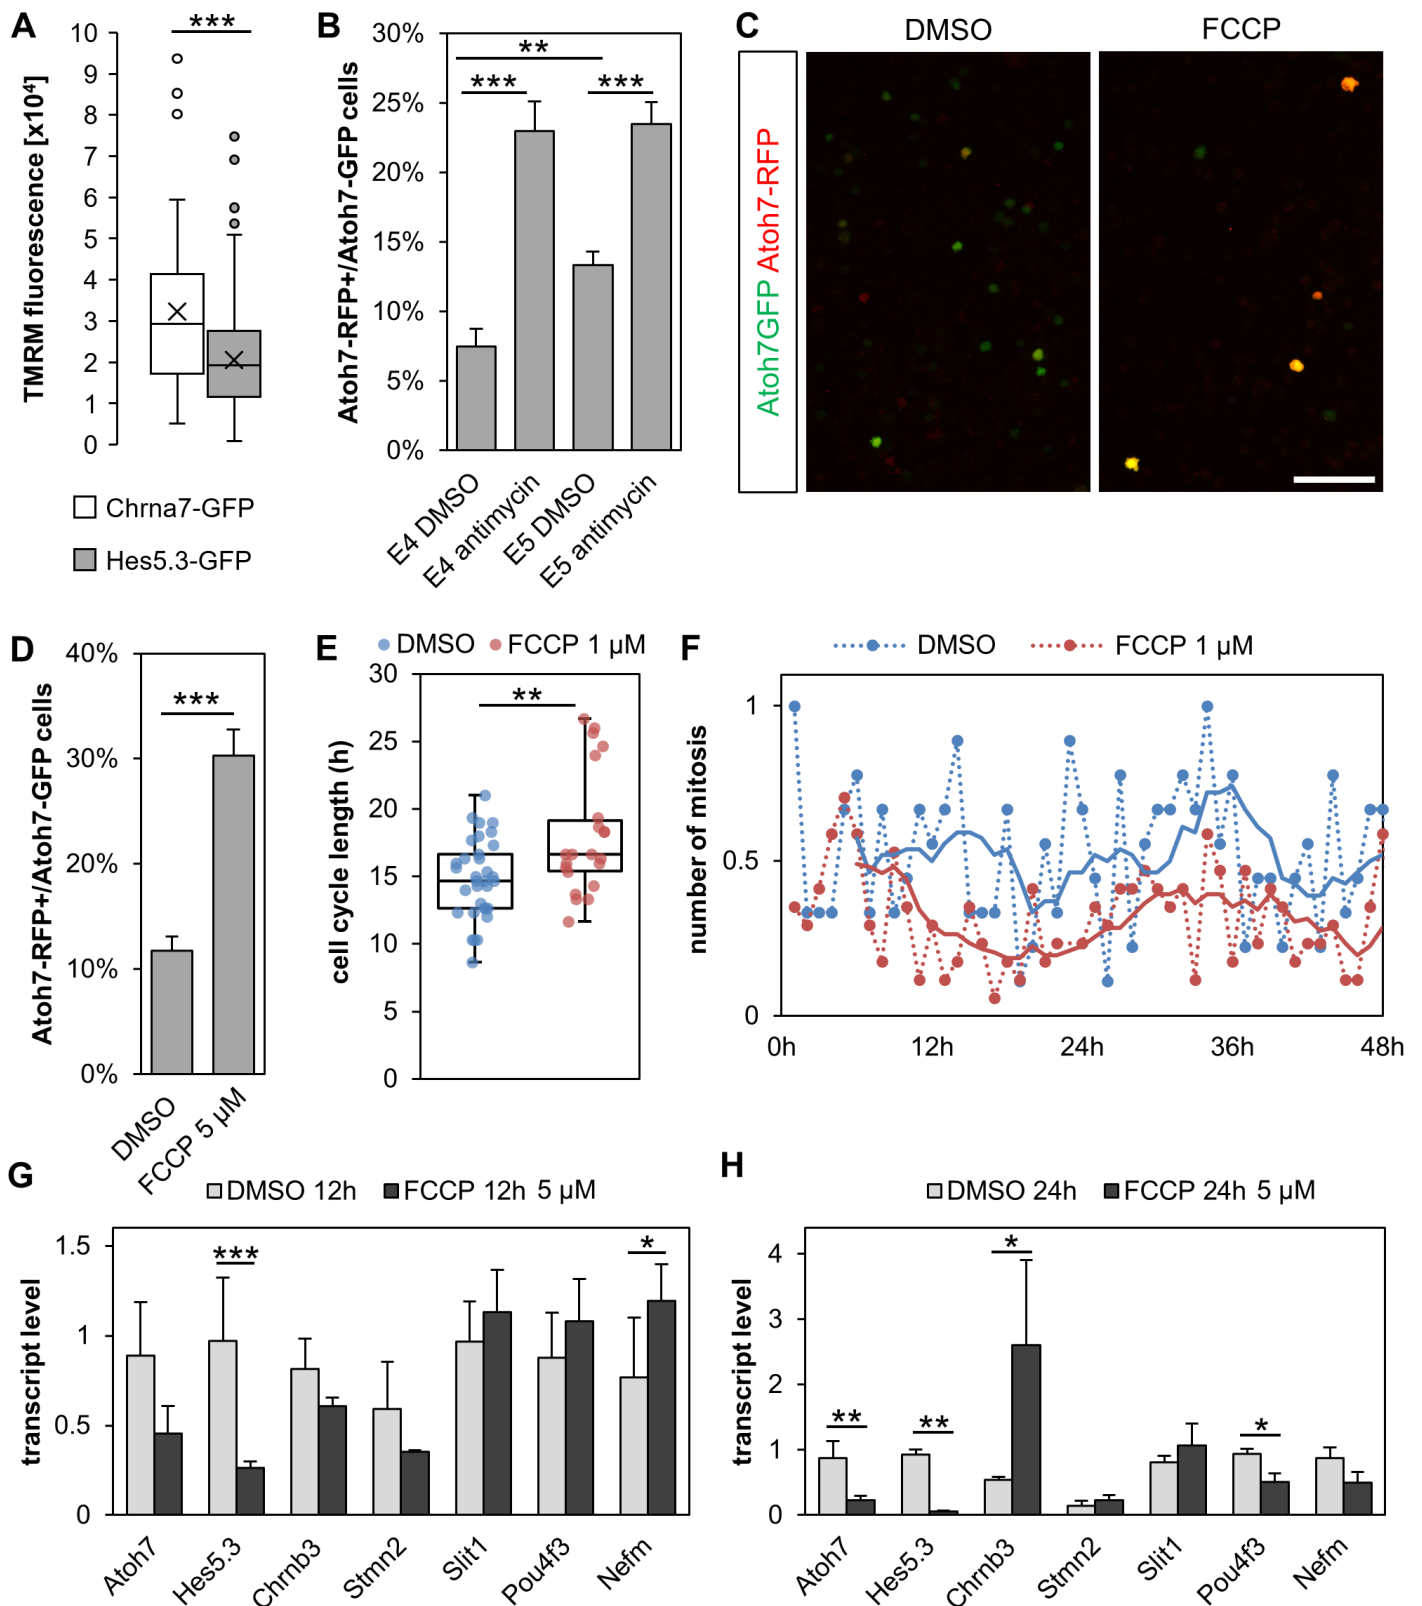

**Figure 4: Low mitochondrial membrane potential promotes RGC genesis**

(A) TMRM fluorescence in uncommitted vs. pre-committed progenitors. E4 or E5 retinas were electroporated with Chrna7-GFP or Hes5.3-GFP, respectively. Cells were dissociated 24 h (Chrna7-GFP) or 8 h later (Hes5.3-GFP) and stained with 1 nM TMRM. TMRM fluorescence was quantified in individual GFP+ cells as the sum of all pixel intensities ( $p < 0.001$ ; unpaired t-test; Hes5.3-GFP  $n = 501$  cells, Chrna7  $n = 51$ ). (B-D) Antimycin A and FCCP increase the proportion of cells that enter the RGC lineage. (B) E4 and E5 retinas were electroporated with Atoh7-GFP and Atoh7-RFP and incubated with 36  $\mu\text{M}$  Antimycin A or DMSO. Ratio of RFP+ to GFP+ cells are presented as mean  $\pm$  s.d. ( $***p < 0.001$ ,  $**p < 0.01$ , Chi square test, E4 DMSO  $n = 427$  cells, E4 Antimycin  $n = 396$ , E5 DMSO  $n = 1199$ , E5 Antimycin  $n = 719$ ). (C-D) E4.5 retinas were electroporated with Atoh7-GFP and Atoh7-RFP and incubated with 5  $\mu\text{M}$  FCCP or DMSO. Cells were dissociated for confocal imaging (C) and cell counting (D). Ratio of RFP+ to GFP+ cells are presented as mean  $\pm$  s.d. ( $***p < 0.001$ , Chi square test, DMSO  $n = 545$  cells, FCCP  $n = 635$ ). (E, F) FCCP influences the cell cycle length. E4 retinas were electroporated with Chrna7-GFP and incubated with 1  $\mu\text{M}$  FCCP or DMSO. (E) Cell cycle length from 22 cells (FCCP) and 33 cells (DMSO) tracked in real time from mitosis to mitosis. (F) Plot showing the average mitosis frequency as a function of time in 9 (DMSO) or 17 (FCCP) live imaging movies. Solid lines represent moving average over 6 periods. (G, H) FCCP influences RGC genesis. The right or left retinas from two embryos at E4 were incubated, respectively, with 5  $\mu\text{M}$  FCCP or DMSO and processed for RT-qPCR analysis 12 h (G) or 24 h (H) later in triplicate. Scale bar: 50  $\mu\text{m}$ .

Figure 5

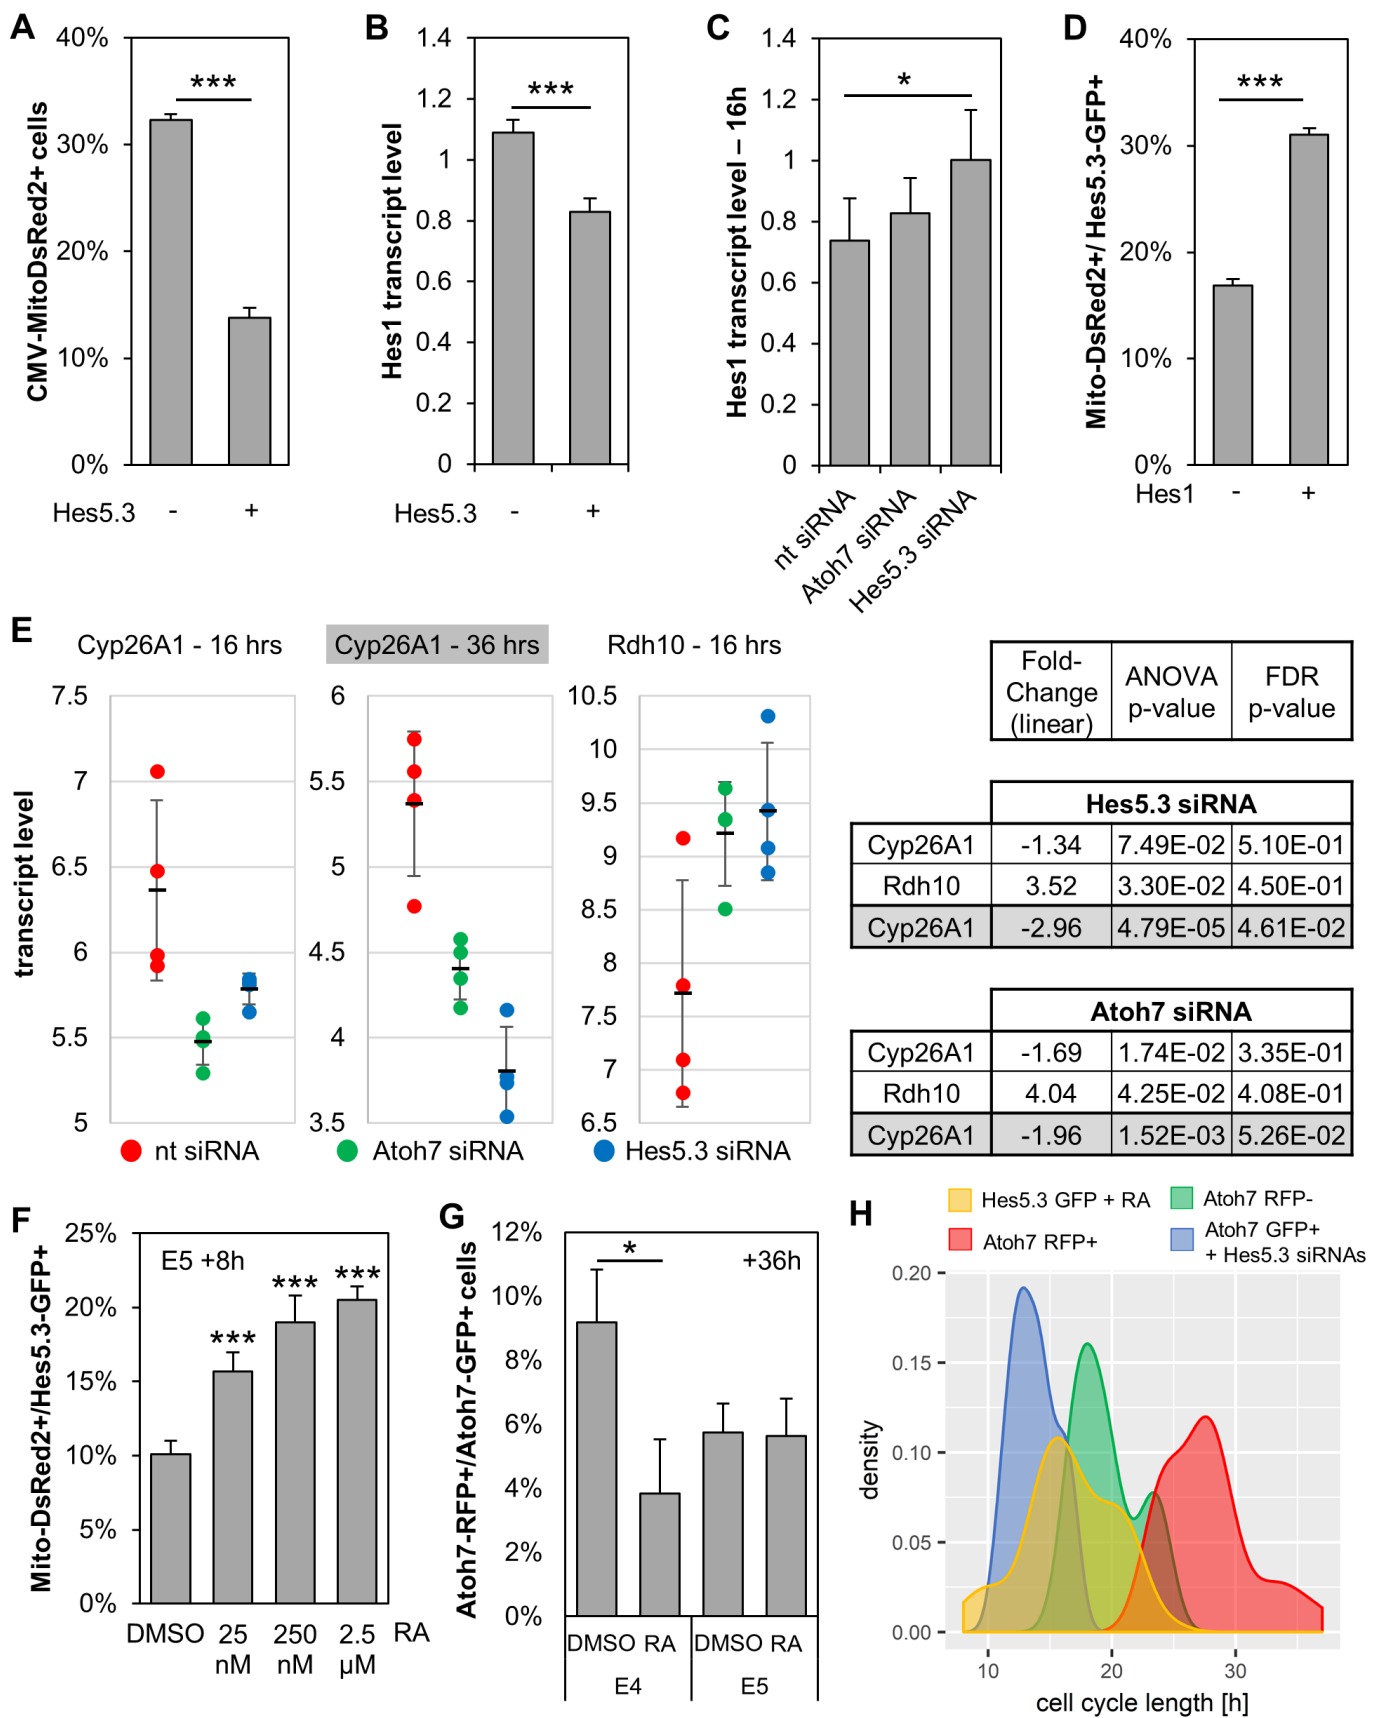

**Figure 5: HES5.3 regulates mitochondrial activity via Hes1 repression and RA degradation**

(A) Forced expression of Hes5.3 decreases the proportion of cells with MitoDsRed2-labelled mitochondria. E5 retinas were electroporated with  $\beta$  actin-Hes5.3:GFP or CMV-GFP, and CMV-MitoDsRed2. GFP+ cells were isolated by FACS 24h later. Percentage of GFP+ cells with mitochondria are presented as mean  $\pm$  s.d. (\*\*p<0.001; Chi square test; Hes5.3-GFP n=3965 cells,  $\beta$  actin-Hes5.3:GFP n=1421). (B, C) HES5.3 represses Hes1. (B) E3.5 retinas were electroporated with  $\beta$  actin-Hes5.3:GFP or CMV-GFP and processed for RT-qPCR analysis 24 h later. (C, E) E3.5 retinas were electroporated with siRNAs and Hes5.3-RFP. Retina fragments encompassing the edge of the expanding Hes5.3 domain were processed for RT-qPCR (C) or Affymetrix analysis (E) (16h, this paper; 36h, Chiodini et al., 2013). In B and C, data were obtained in four independent experiments and are presented as mean  $\pm$  s.d. (\*\*p<0.001, \*p<0.05 Welch's t test). (D) Forced expression of Hes1 increases the proportion of Hes5.3+ cells with MitoDsRed2-labelled mitochondria. E5 retinas were electroporated with Hes5.3-GFP alone or in combination with EMSV-Hes1. GFP+ cells were isolated by FACS 8 h later. Percentages of GFP+ cells with mitochondria are presented as mean  $\pm$  s.d. (\*\*p<0.001; Chi square test; ctrl n=4993 cells, EMSV-Hes1 n=5605). (E) Effects of Atoh7 and Hes5.3 siRNAs on the RA signaling pathway. For Rdh10, there is no effect at 36 h, probably due to HES5.3 stimulating the transcription of its own gene (Fior and Henrique, 2005; Chiodini et al., 2013). (F) RA increases the proportion of cells with MitoDsRed2-labelled mitochondria. E5 retinas were electroporated with Hes5.3-GFP and CMV-MitoDsRed2 and incubated with RA or DMSO. Cells were dissociated 8 h later. Percentages of GFP+ cells with mitochondria are presented as mean  $\pm$  s.d. (\*\*p<0.001, Chi square test, DMSO n=1129 cells, 25 nM RA n=772, 250 nM RA n=484, 2.5  $\mu$ M RA n=1930). (G) RA decreases the proportion of cells that enter the RGC lineage. Retinas at E4 and E5 were electroporated with Atoh7-GFP and Atoh7-RFP and incubated with 2.5  $\mu$ M RA or DMSO. Cells were dissociated 36 h later. Ratio of RFP+ to GFP+ cells in the presence or absence of RA. Data are presented as mean  $\pm$  s.d. (\*p<0.05; Chi-square test; E4 DMSO n=305 cells, E4 RA n=130, E5 DMSO n=678, E5 RA n=384). (H) Four E4 chick retinas were electroporated with Hes5.3-GFP, 2.5  $\mu$ M RA was added and retinas were processed for Time-Lapse imaging 24h later. 64 cells were tracked from mitosis to mitosis. Density plot of cell cycle length (data in Fig. S6B) showing that cell cycle of a subpopulation of Hes5.3-GFP cells treated with 2.5  $\mu$ M RA (yellow) is similar to that of Atoh7-GFP cells treated with Hes5.3 siRNA (blue) and shorter than that of cells expressing Atoh7 at low (green) or high levels (red). Cells expressing Atoh7 at low level (green) and cells expressing Hes5.3 constitute the same subset (Chiodini et al., 2013).

Figure 6

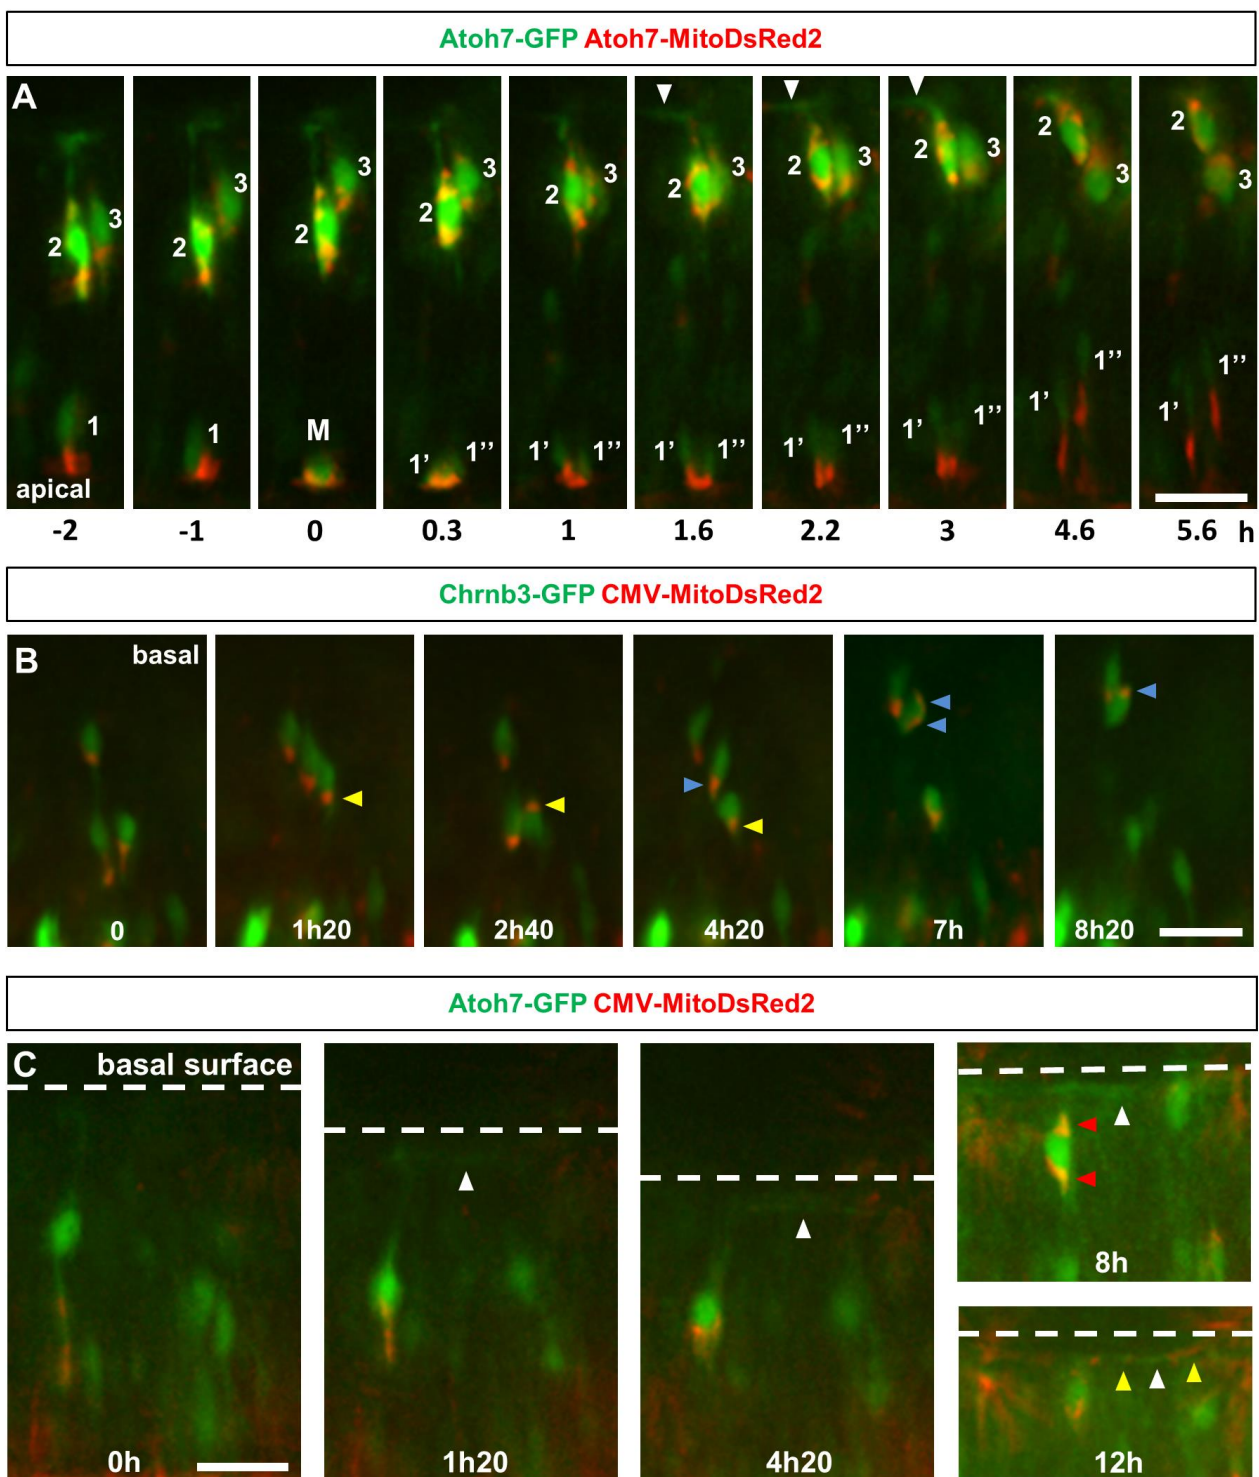

**Figure 6: mitochondria relocate in newborn RGCs**

(A-C) Stills from time-lapse movies in the green and red channels. Electroporated E5 chick retinas were incorporated in a collagen matrix and imaged 24 h later ( $t_0$ ). (A) Cell 1: the stills show mitochondria accumulation at the apex of an Atoh7+ cell before the last mitosis (M). Mitochondria are equally distributed between the two daughter cells (1' and 1''). Cells 2 and 3 are newborn RGCs reaching the basal side (the white arrowheads show an axon). The relative differences in fluorescence intensities between the cell 1 and the cells 2 & 3 are consistent with the fact that, while activity of the Atoh7 promoter increased before the ultimate mitosis, it reached peak level well after the last cell division. Cells strongly labeled with the ATOH7 antibodies are unlabeled with BrdU (Fig. S3, Chiodini et al., 2013). (B, C) Mitochondria localization in newborn RGCs expressing Chrn3 (B) or Atoh7 (C). (B) Mitochondria translocate from the apical to the basal side (blue arrowheads) or undergo back and forth movements (yellow arrowheads) during the basal migration of the soma. (C) The white arrowheads show an axon filled with mitochondria (yellow arrowheads at 12 h). (C, 8 h) A RGC reaching the basal aspect with mitochondria at both poles of the cell body (red arrowheads). Scale bars: 20  $\mu\text{m}$  (A, B, C).

Figure 7

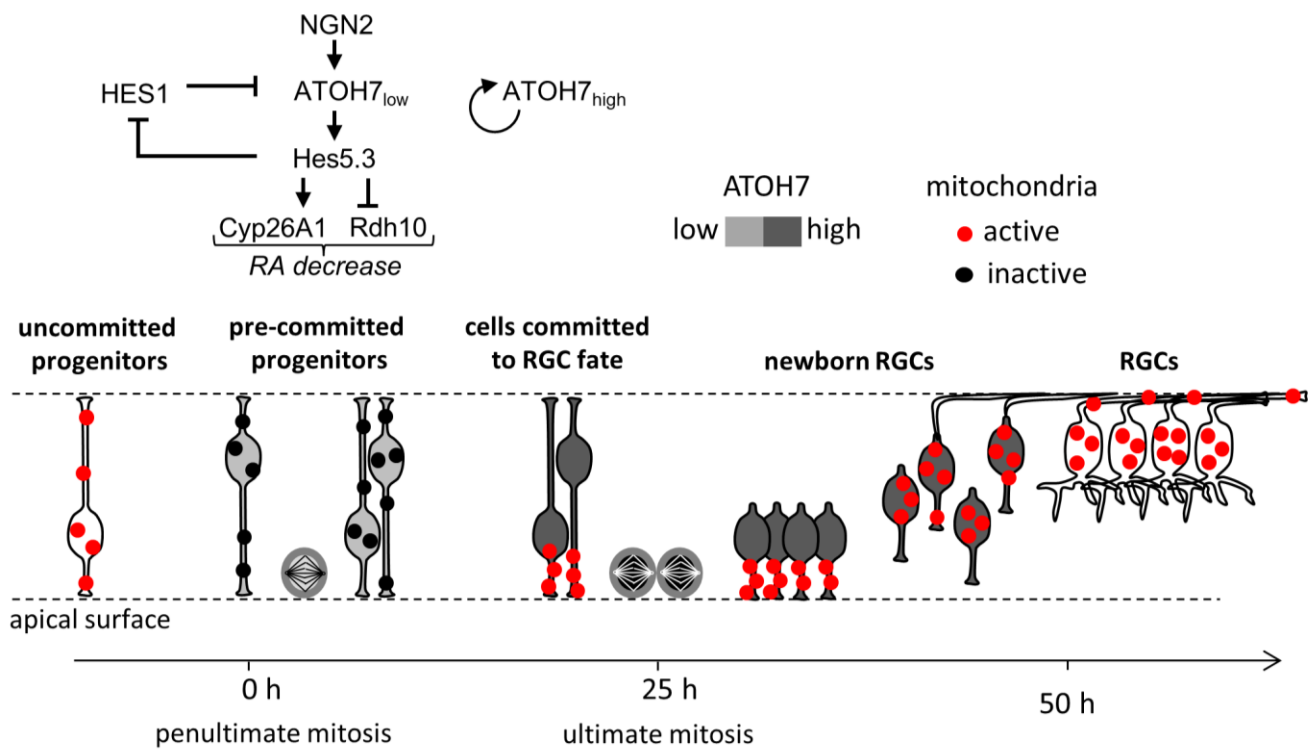

**Figure 7: Model describing associations between key transcription factors, the RA signaling pathway and changes in mitochondrial activity**

ATOH7 activates Hes5.3, which, in turn, induces a decrease in mitochondrial activity via the RA signaling pathway. This metabolic shift slows down the cell cycle progression and is a necessary step for ATOH7 to induce RGCs.



## SUPPLEMENTARY MATERIAL

Figure S1

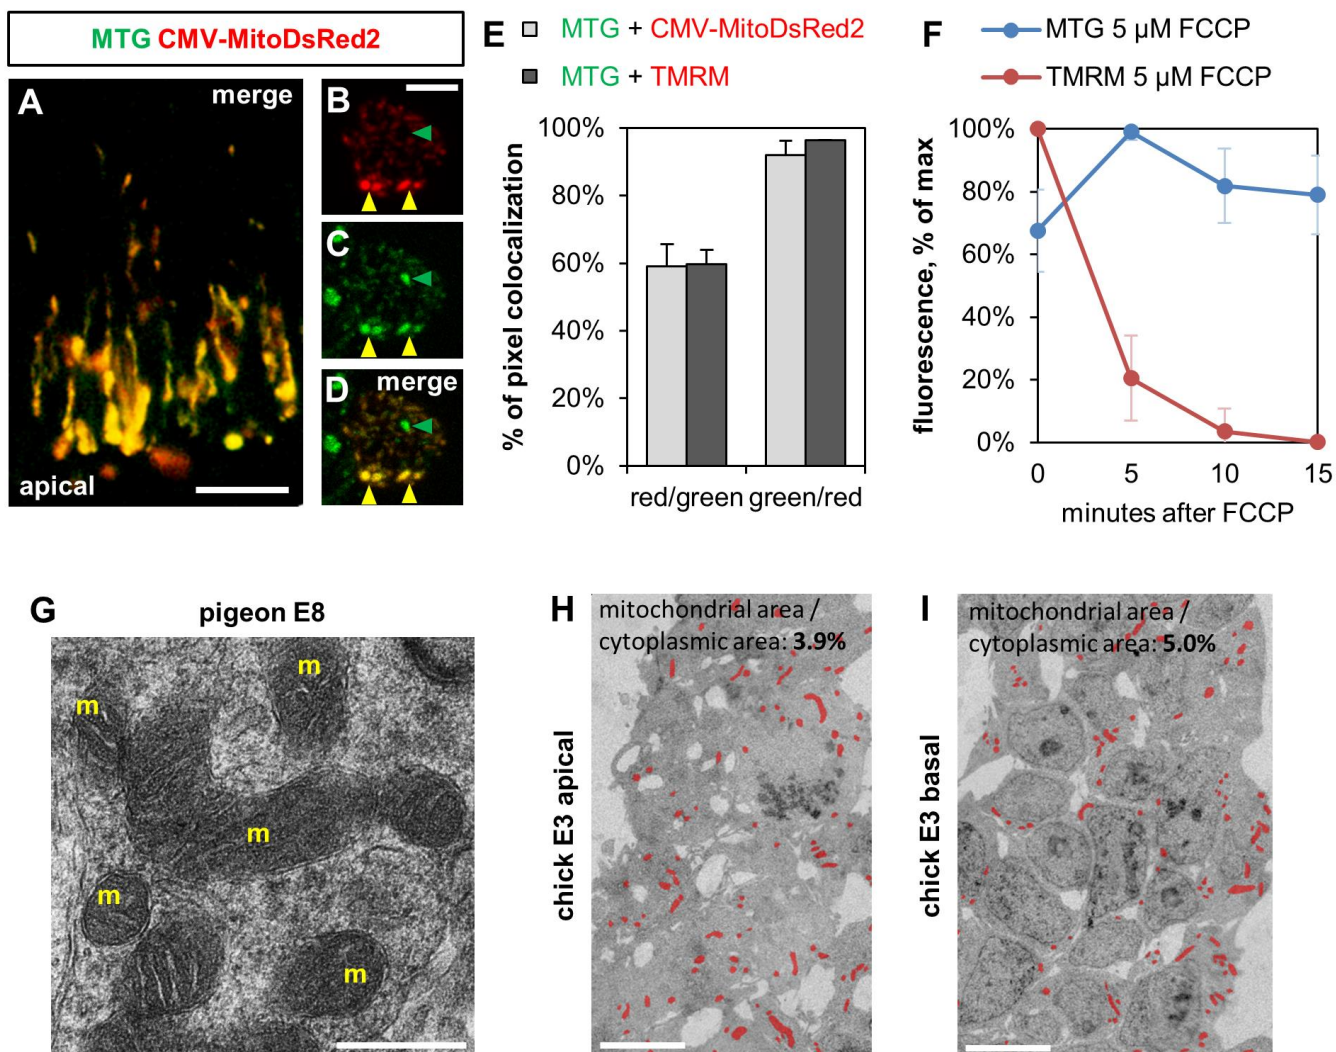

**Figure S1: mitochondria detection**

(A-D) Co-localization of MitoDsRed2 and MitoTracker Green FM (MTG) labeling. E5 retinas were electroporated with a CMV-MitoDsRed2 plasmid. (A) 24 h later, the retina was incubated with MTG and processed for confocal imaging. (B-D) Red cells were selected by FACS, incubated with MTG and processed for confocal imaging 24 h later. Colocalization of MitoDsRed2 and MTG in a single cell. Yellow arrowheads: double-labeled mitochondria. Green arrowhead: mitochondria unlabeled with MitoDsRed2. (E) Colocalization of MTG with MitoDsRed2 or TMRM. Light gray bar: E5 retina was electroporated with CMV-MitoDsRed2, cells were dissociated 8h later and stained with MTG. Dark grey bars: dissociated E5 retinal cells were stained with MTG and TMRM. Quantification of the proportion  $\pm$  s.d. of co-localized pixel for each condition shows that while almost all mitochondria positive for TMRM or MitoDsRed2 are also MTG positive (green/red), lower fractions of MTG positive mitochondria are TMRM or CMV-MitoDsRed2 positive (red/green). (F) Addition of FCCP decreases TMRM signal but has no effect on MTG signal. Dissociated E5 retinal cells were stained with MTG and TMRM. Cells were imaged under confocal microscope at 37°C at 5 minutes interval following addition of 5  $\mu$ M FCCP. Graph shows mean  $\pm$  s.d. of the ratio of fluorescence at each time point relative to maximal fluorescence for 44 cells. (G) TEM showing mitochondria (m) in E8 pigeon retina. (H-I) TEM on apico-basal cross sections of chick retina at E3 (HH20). Mitochondria are artificially colored in red. The ratios of mitochondrial to cytoplasmic areas are similar on the basal and apical sides. Scale bars: 20  $\mu$ m (A), 5  $\mu$ m (B, H, I), 0.5  $\mu$ m (G).

Figure S2

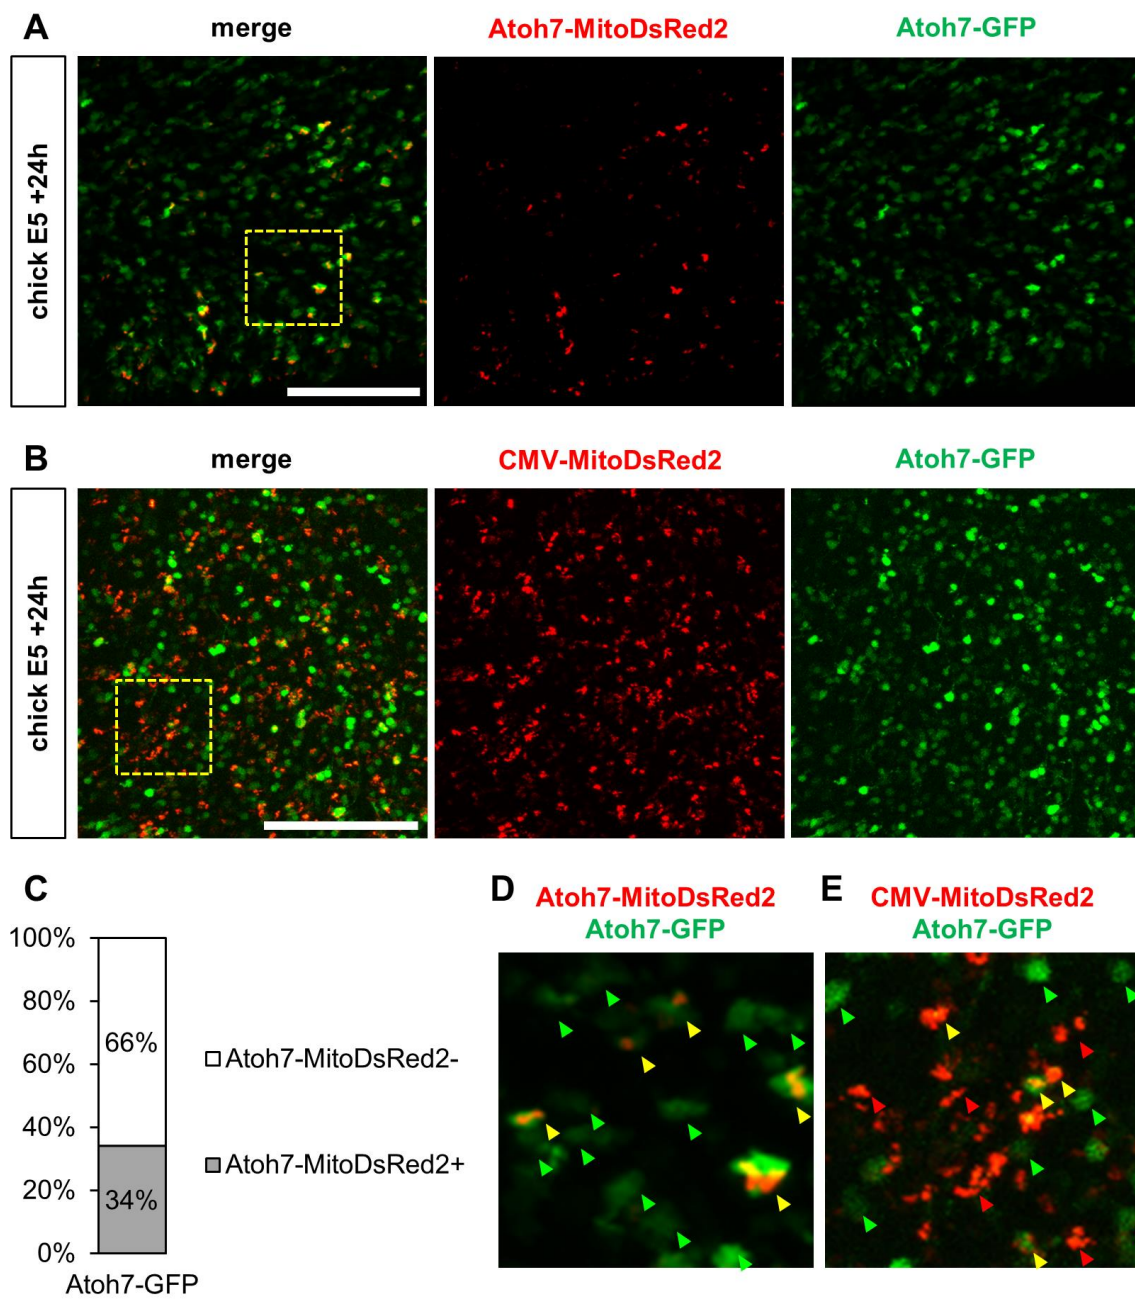

**Figure S2: Atoh7-MitoDsRed2 labels mitochondria in a subset of Atoh7-GFP cells.**

(A-B) Maximal projections from confocal of E5 chick retina co-electroporated with Atoh7-GFP and Atoh7-MitoDsRed2 (A) or with Atoh7-GFP and CMV-MitoDsRed2 plasmids (B) and fixed 24 h later. (C) Mean percentage of GFP+ cells with mitochondria in retinas electroporated with Atoh7-GFP and Atoh7-MitoDsRed2 as displayed in panel A (n=839). (D) Higher magnification of the yellow square from panel A. Fluorescent mitochondria in retinas co-electroporated with Atoh7-MitoDsRed2 and Atoh7-GFP were exclusively located in GFP+ cells. (E) Higher magnification of the yellow square from panel B. The CMV-MitoDsRed2 reporter plasmid does not exhibit this specificity. Green arrowheads: cells positive for Atoh7-GFP and negative for MitoDsRed2 signal; Red arrowheads: cells negative for Atoh7-GFP and positive for MitoDsRed2 signal. Yellow arrowheads: cells positive for Atoh7-GFP and MitoDsRed2 signal.

Figure S3

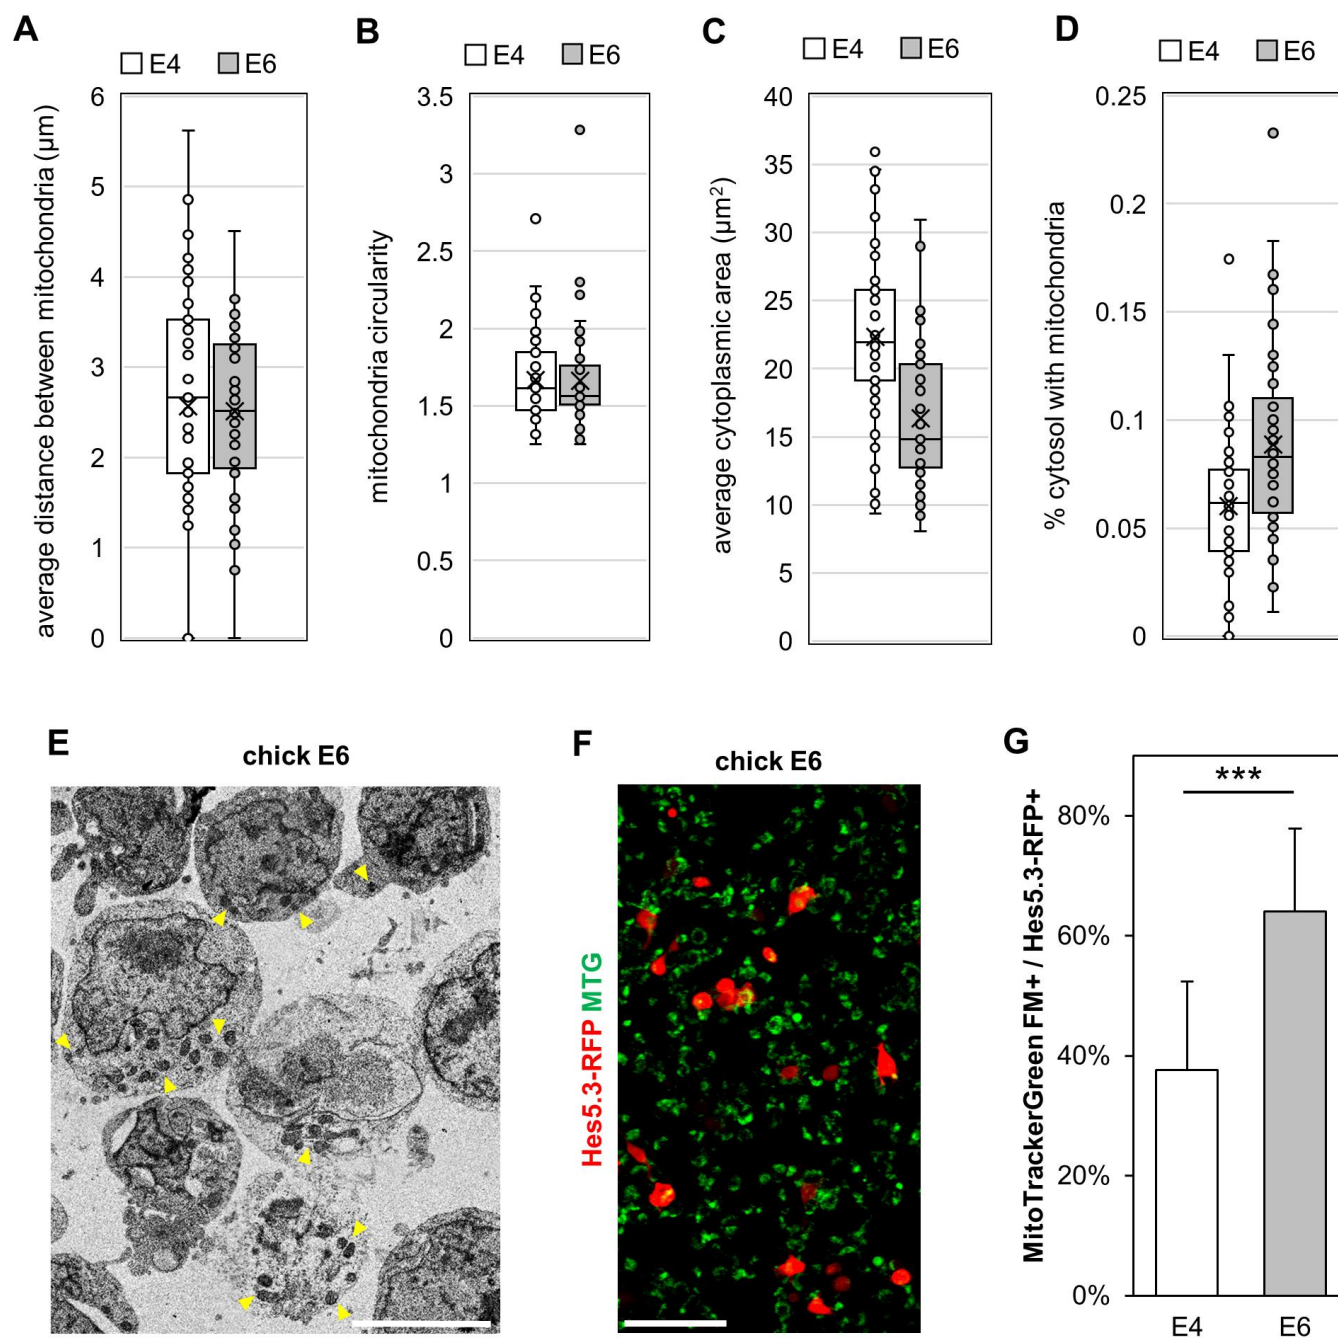

**Figure S3: mitochondria in Hes5.3<sup>+</sup> progenitors**

(A-D) Morphometric measurements of mitochondria in individual Hes5.3-GFP<sup>+</sup> progenitors (E4 n=51 cells, E6 n=55). (A) Average distance between mitochondria in  $\mu\text{m}$ , measured as the distance from centers of fitted ellipses ( $p < 0.05$ ; unpaired t-test; n=51-55). (B) Mitochondria circularity, measured as the ratio of major to minor lengths of fitted ellipse, remains constant ( $p > 0.05$ ; unpaired t-test; n=51-55). (C) The average cytoplasmic area is significantly lower at E6 than at E4 ( $p < 0.001$ ; unpaired t-test; n=51-55 cells). (D) Difference in A is consistent with the increased proportion of cytoplasm filled with mitochondria at E6 ( $p < 0.001$ ; unpaired t-test; n=51-55 cells). (E) An example of a TEM image processed for quantifications shown in A-D and Fig. 3D. Yellow arrowheads point to regions enriched with mitochondria. (F, G) E4 and E6 retinas (4 and 2 respectively, pooled and processed as one biological replicate) were electroporated with Hes5.3-RFP and stained with 150 nM MTG 24 h later. (F) An example of confocal image used for the quantifications shown in G. (G) Average MTG signal relative to Hes5.3-RFP signal measured in multiple images of similar dimensions. MTG density is higher at E6 than at E4 ( $***p < 0.001$ , unpaired t-test, E4 n=11 images, E6 n=10). Scale bars: 5  $\mu\text{m}$  (E), 50  $\mu\text{m}$  (F).

Figure S4

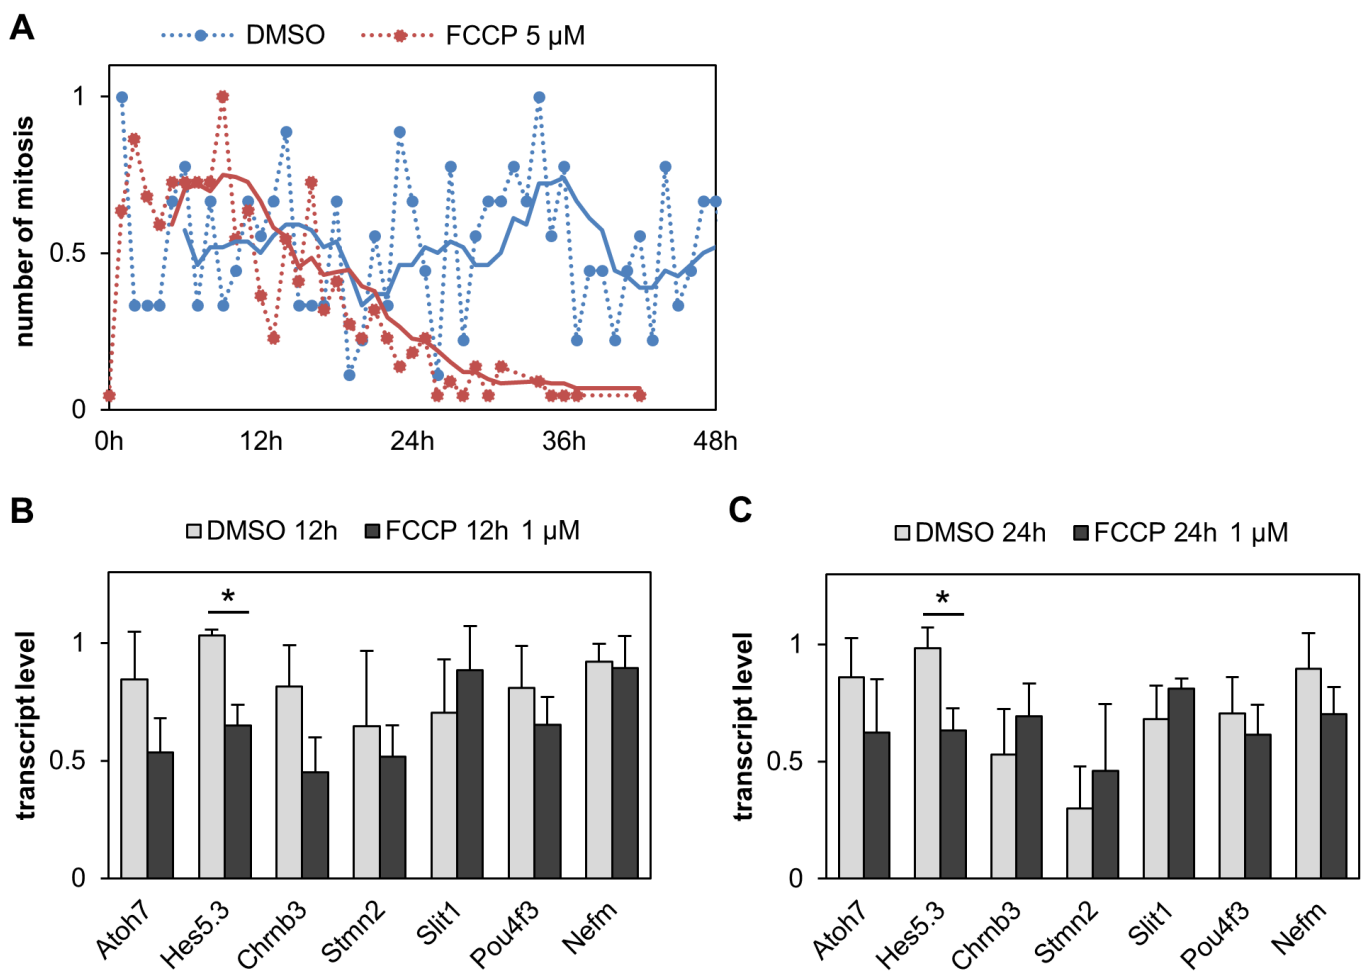

***Figure S4: Effect of FCCP on the cell cycle length and expression of RGC markers***

Results presented here complement the data provided in Figure 4. (A) E4 retinas were electroporated with Chrna7-GFP and incubated with 5  $\mu$ M FCCP or DMSO. Plot showing the average mitosis frequency as a function of time in 9 (DMSO) or 22 (FCCP) live imaging movies. (B, C) The right or left retinas from two embryos at E4 were incubated with 1  $\mu$ M FCCP or DMSO and processed for RT-qPCR analysis 12 h (B) or 24 h (C) later.



Figure S5

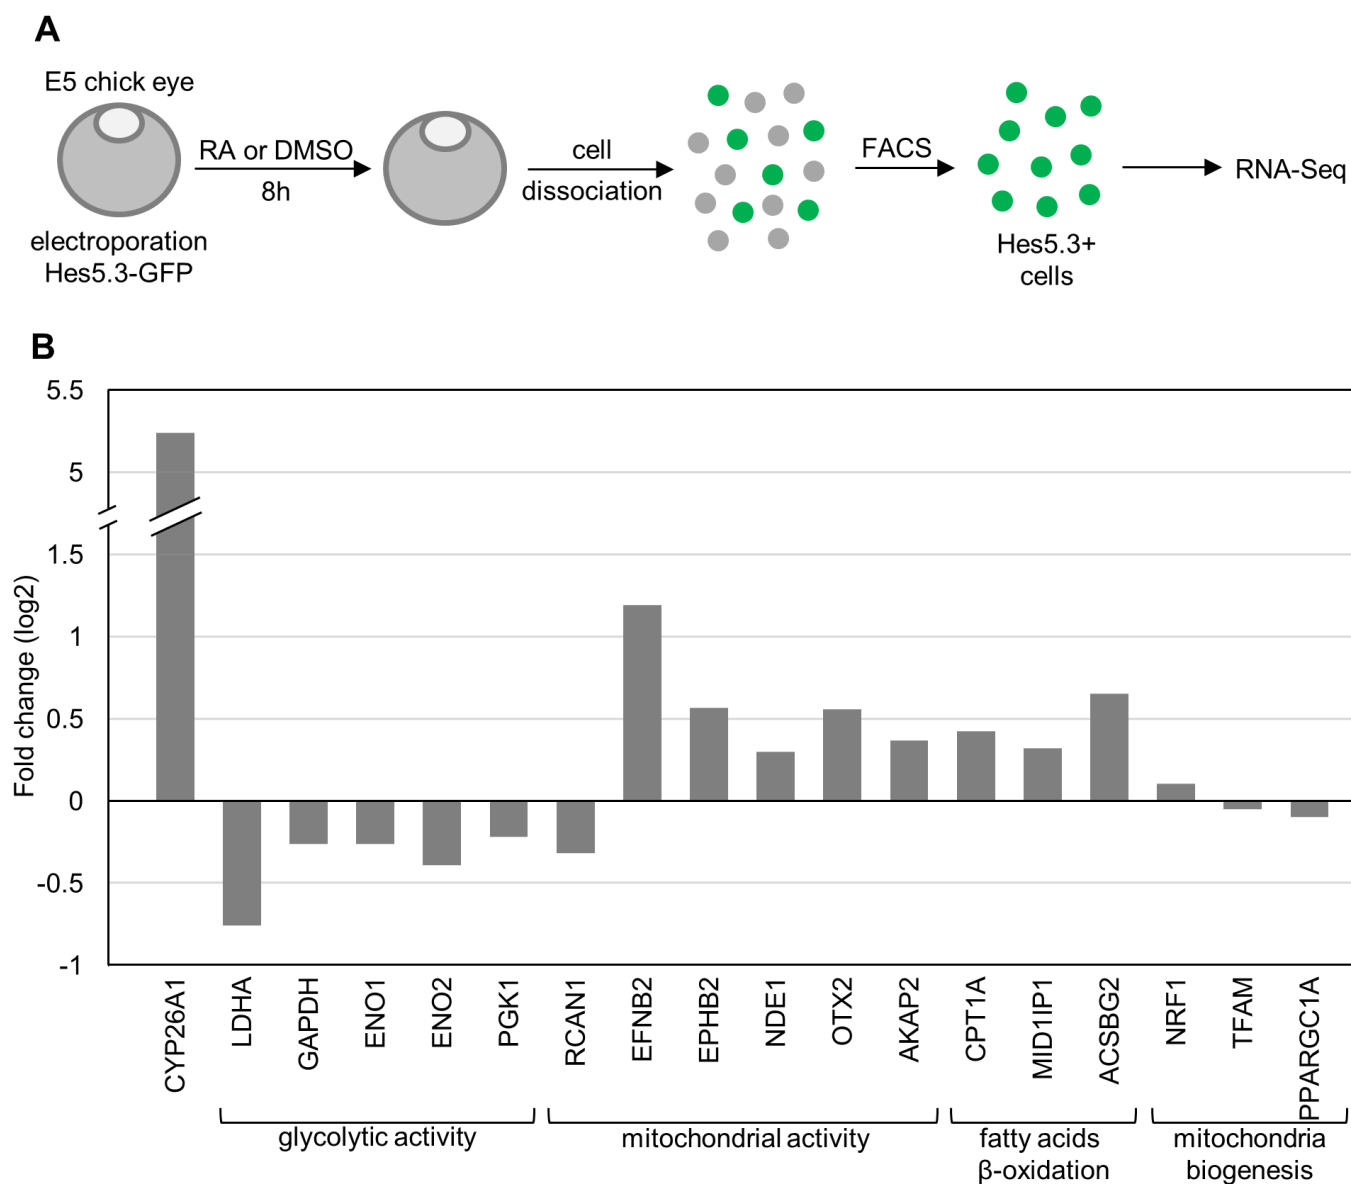

**Figure S5: RNA-Seq transcriptome of Hes5.3+ cells**

RNA-Seq analysis revealed inhibitory effect of RA on glycolysis in Hes5.3+ pre-committed progenitors. The right or left retinas of 12 embryos at E5 were electroporated with Hes5.3-GFP and cultured in presence of, respectively, 2.5  $\mu$ M RA or DMSO for 8 h. Retinal cells were dissociated, Hes5.3+ fluorescent cells were isolated by FACS, RNA was extracted and processed for RNA-Seq in triplicate. (A) Schematic representation of the protocol. (B) Bar graph generated from RNA-Seq data showing a selection of genes regulated by RA. Positive or negative fold changes in log<sub>2</sub> are presented relative to control DMSO. RA treatment induced an increase of RA-degradative enzyme Cyp26a1, a decrease of expression of five key glycolytic enzymes and of RCAN1, i.e., an inhibitor of mitochondrial metabolism, an upregulation of potential activators of mitochondria metabolism and of fatty acids  $\beta$ -oxidation in mitochondria. Master regulators of mitochondria biogenesis remained unchanged. Statistical analysis: fold changes have  $p < 0.05$  except for NRF, TFAM and PPARGC1A.

Figure S6

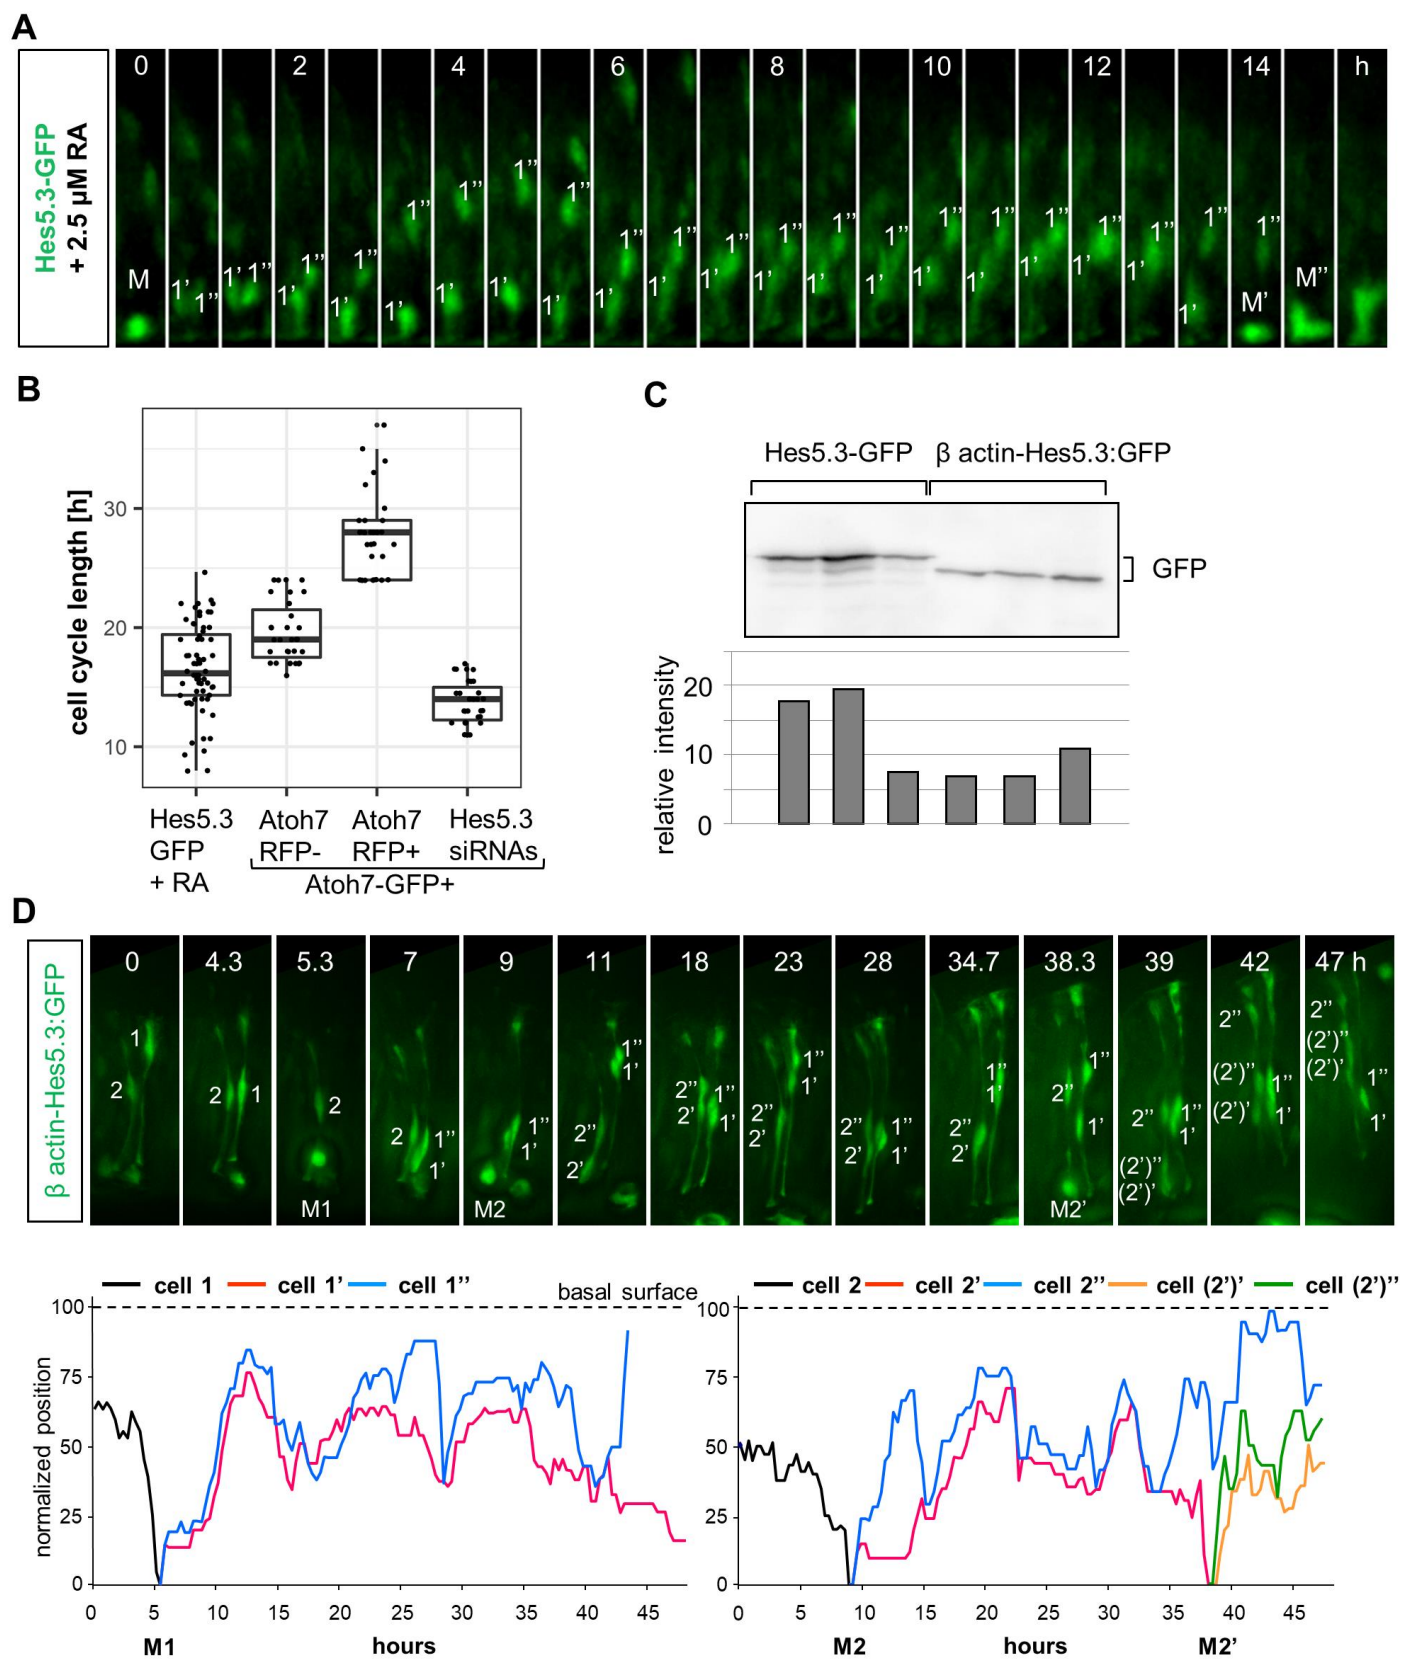

**Figure S6: Effects of RA and of HES5.3 on the cell cycle length.**

(A-B) RA influences the cell cycle length. E4 chick retinas were electroporated with Hes5.3-GFP, 2.5  $\mu$ M RA was added and retinas were processed for Time-Lapse imaging 24 h later. (A) Stills from a Time-Lapse movie with a 20 min interval presented as max projections. Hes5.3-GFP+ pre-committed progenitor cells going from mitosis (M) to mitosis (M' and M''). The trajectories of the two daughter cells 1', 1'' are shown. (B) 64 cells were tracked from mitosis to mitosis. The Atoh7-GFP+ RFP-, Atoh7-GFP+ RFP+ and Hes5.3 siRNAs data are from Chiodini et al. (2013). Hes5.3-GFP+ pre-committed progenitors incubated with RA display cell cycle lengths significantly different from all other groups (p-value < 0.001; unpaired t-test; Hes5.3-GFP + RA n = 64, all other groups n = 31). (C) Similar activities of the *Hes5.3* and  $\beta$ -actin promoters. E4 retinas were electroporated with either a Hes5.3-GFP reporter plasmid or a  $\beta$ -actin-Hes5.3:GFP expression vector. Cytosolic fractions from six retinas were isolated 24 h later and GFP was quantified by western blot. GFP accumulated at similar levels, indicating that *Hes5.3* put under the control of a  $\beta$ -actin promoter is expressed within physiological range. (D) Overexpression of Hes5.3 lengthens the cell cycle. E4 retinas were electroporated with a  $\beta$  actin-Hes5.3:GFP expression vector and fluorescent cells were monitored in real-time 12 h later. (D, upper panel) Stills from a movie spanning 47 h. Positions and mitosis (M) of cell 1 and cell 2 and of their progeny are shown. (D, lower panel) High resolution interkinetic nuclear migration (INM) of cell 1 and 2 and of their progeny 1', 1'' (left) and 2', 2'', (2')', (2')'' (right). Note that only the cell 2' completes a full cell cycle during the monitoring period.

**Movie S1**

Time-lapse at 20 minutes interval of chick E5 equatorial retina electroporated Atoh7-GFP and Atoh7-MitoDsRed2, showing mitochondria distribution during penultimate and ultimate mitosis of a committed RGC. Mitosis (M), parent cell (yellow arrowhead), daughter cells following first division (red and cyan arrowheads), and daughter cells from 2<sup>nd</sup> division (blue, orange and green arrowheads) are shown. Time shown as hours:minutes.

**Movie S2**

Time lapse of a RGC axon growing on the basal surface at 22 seconds interval, from a chick E6 retina electroporated with CMV-GFP and CMV-MitoDsRed2. Top: GFP channel, bottom: DsRed2 channel, middle: merge. Growth cone labelled with yellow arrowhead. Time shown as hours:minutes:seconds.

**Table S1**

List of primers used in this study for qPCR (mt-DNA, gDNA) and for RT-qPCR (transcripts). Genes used for normalization of RT-qPCR are in italic.

**RTqPCR primers**

|              | Chick                            |                               |
|--------------|----------------------------------|-------------------------------|
|              | forward                          | reverse                       |
| Atoh7        | GTGGATCAGGCTGTGTTGTG             | CCCACTGTGGAACCACCTTC          |
| Chrn3        | CATCAGGCAGGTTGTCCAAGA            | CCACCAGGAATAACCACAGGA         |
| Hes5.3       | TTTCATGGAGCCCGACAACC             | CAGCTTCAGCTGCTCAATGC          |
| NCoR1        | GAAGCACCGCAGTATTGTCC             | TGGTTGTAAAGCGGCAGTTC          |
| PGC-1a       | CATCGAGTGTGCTGCTCTGG             | ACTGGTCGCTGTACCACTTG          |
| TFAM         | CCAGTTCTCAAAGCAGCCATAC           | GTCTTCACGTCCAAGTTCAACC        |
| NRF          | CACGCTGGATGAGTACACCAC            | TACTTGCCTACCACATTCTCCAAG      |
| Nix          | GCCATGTCCAGCCCTCAG               | GCTATTGCCATTGCCGTTCA          |
| STMN2        | TGATCTGCTCCTGCTTCTAC             | CGCTTGTTGATCTGCTTCAC          |
| KIF 11       | TATTCCAGCCGTTCCCACTC             | TTGTCAACTGCCCCAGATCG          |
| SLIT1        | GTCAGGAGGAGACGAGTTGC             | ATCCAGGTAGAGCTCGGTGA          |
| Pou4F3       | ACCGGAGATCTACACGGGAG             | CACGGCAAAGTAAGCCTCCA          |
| NEFM         | CACCACCTATCAGGACACGA             | ACTCCCTCAAATGACGTGCC          |
| <i>GAPDH</i> | <i>CCTCTCTGGCAAAGTCCAAG</i>      | <i>AGCACCACCCTTCAGATGAG</i>   |
| <i>EEF1A</i> | <i>CCCGAAGTTCCTGAAATCTG</i>      | <i>GAAACGACCCAGAGGAGGAT</i>   |
| <i>TBP</i>   | <i>AGTTGTTTCAGAAACTGGGTTTTCC</i> | <i>CAATTCTGGCTCATAGCTGCTG</i> |
| <i>YWHAZ</i> | <i>TAGGTCATCTTGGAGAGTCGTC</i>    | <i>TTTCCAACAGAGACAGCACATC</i> |

**MT-DNA and G-DNA primers**

|         | Chick                    |                         |
|---------|--------------------------|-------------------------|
|         | forward                  | reverse                 |
| MT-CO1  | ACTCCAACCCGAATTAAGTGC    | GCTGGTTCTTCGAAGGTGTG    |
| MT-ATP6 | GTACGCCTAACAGCAAACCTC    | ATTGGTAGTAGGGCGATTGTGG  |
| MT-rRNA | GGATGTGAAACCCGCCCTTA     | TGGCTTGTGAAGAGGGTGAC    |
| MT-tRNA | GCCCAACTAAGACCAACAGGA    | GGGATCGAAGCCCATCTGTC    |
| G-Atoh7 | GTGGATCAGGCTGTGTTGTG     | CCCACTGTGGAACCACCTTC    |
| G-Chrn3 | AATGCCCTGAGACAGCCTTC     | GGTGTGAGTGGTGACAGAGG    |
| G-GAPDH | CCACATGGCATCCAAGGAGT     | GAACTGAGCGGTGGTGAAGA    |
| G-YWHAZ | TCTGCAACGAGAGCTCCATG     | ATCTGCAGTGAAGGGAAGGC    |
|         | Pigeon                   |                         |
|         | forward                  | reverse                 |
| MT-02   | AGCCTTCGTCCAAGTACAAGA    | CATAAGTGGTTTGTGCGGTTG   |
| MT-03   | TCGTCCTACTCCTAAGCCTCTAC  | TTGCTCCTAGAATGGGTCAGG   |
| G-01    | GCACACTATGGATTTCCAGCC    | TGGCACGCTGTATGCTACTT    |
| G-02    | AGCTTGATGTCGCTGCTAA      | AGCTACCTAAGTTGCCAGTCA   |
| G-03    | CTTGCTTAGTTTGGGTGACTGAAC | CATACCTCATACCATGTGCCTCC |
| G-04    | CTGAGCTGCCATTCTCCACA     | GGACCAGGAGGTCTCAGGAT    |
